# Supplementary material for: Natural population cohort study on long-lived adults: West China longevity and ageing procedure (WCLAP)
Source: PubMed Central journal article supplement — BMJ Open. 2022 Jun 14;12(6):e055407. doi: 10.1136/bmjopen-2021-055407 (PMC9198704; doi:10.1136/bmjopen-2021-055407), 2022-06-14
Supplement: bmjopen-2021-055407.draft_revisions.pdf [file bmjopen-2021-055407.draft_revisions.pdf]

# BMJ Open

BMJ Open is committed to open peer review. As part of this commitment we make the peer review history of every article we publish publicly available.

When an article is published we post the peer reviewers' comments and the authors' responses online. We also post the versions of the paper that were used during peer review. These are the versions that the peer review comments apply to.

The versions of the paper that follow are the versions that were submitted during the peer review process. They are not the versions of record or the final published versions. They should not be cited or distributed as the published version of this manuscript.

BMJ Open is an open access journal and the full, final, typeset and author-corrected version of record of the manuscript is available on our site with no access controls, subscription charges or pay-per-view fees (<http://bmjopen.bmj.com>).

If you have any questions on BMJ Open's open peer review process please email [info.bmjopen@bmj.com](mailto:info.bmjopen@bmj.com)

# BMJ Open

## Cohort Profile: A natural population cohort study on long-lived adults: West China Longevity and Aging Procedure (WCLAP)

|                               |                                                                                                                                                                                                                                                                                                                                                                                                                                                                                                                                                                                                                                                                                                                                                                                                                                                                                                                                                                                                                                                                                                                                                                                                                                       |
|-------------------------------|---------------------------------------------------------------------------------------------------------------------------------------------------------------------------------------------------------------------------------------------------------------------------------------------------------------------------------------------------------------------------------------------------------------------------------------------------------------------------------------------------------------------------------------------------------------------------------------------------------------------------------------------------------------------------------------------------------------------------------------------------------------------------------------------------------------------------------------------------------------------------------------------------------------------------------------------------------------------------------------------------------------------------------------------------------------------------------------------------------------------------------------------------------------------------------------------------------------------------------------|
| Journal:                      | <i>BMJ Open</i>                                                                                                                                                                                                                                                                                                                                                                                                                                                                                                                                                                                                                                                                                                                                                                                                                                                                                                                                                                                                                                                                                                                                                                                                                       |
| Manuscript ID                 | bmjopen-2021-055407                                                                                                                                                                                                                                                                                                                                                                                                                                                                                                                                                                                                                                                                                                                                                                                                                                                                                                                                                                                                                                                                                                                                                                                                                   |
| Article Type:                 | Cohort profile                                                                                                                                                                                                                                                                                                                                                                                                                                                                                                                                                                                                                                                                                                                                                                                                                                                                                                                                                                                                                                                                                                                                                                                                                        |
| Date Submitted by the Author: | 17-Jul-2021                                                                                                                                                                                                                                                                                                                                                                                                                                                                                                                                                                                                                                                                                                                                                                                                                                                                                                                                                                                                                                                                                                                                                                                                                           |
| Complete List of Authors:     | <p>WU, Xiaochu; Sichuan University West China Hospital, National Clinical Research Center for Geriatrics( WCHSCU)<br/> Zhang, Yan; Sichuan University West China Hospital, National Clinical Research Center for Geriatrics( WCHSCU)<br/> She, Yan; Mei Shan Shi Peng Shan Qu Chinses Medicine Hospital<br/> Wang, Li; People's Hospital of Leshan<br/> Gao, Yanling; Sichuan University West China Hospital of Yibin Hospital<br/> Deng, Yiping; Sichuan University West China Hospital, National Clinical Research Center for Geriatrics( WCHSCU)<br/> Zhang, Tianyao; The No.1 Affiliated Hospital of Chengdu Medical College<br/> Chen, Meijuan; People's Hospital of Leshan<br/> He, Yan; Sichuan University West China Hospital of Yibin Hospital<br/> Chen, Xiaoyan; Sichuan University West China Hospital, National Clinical Research Center for Geriatrics<br/> Hao, Qiukui; Sichuan University West China Hospital, National Clinical Research Center for Geriatrics( WCHSCU)<br/> Yue, Jirong; Sichuan University West China Hospital, National Clinical Research Center for Geriatrics( WCHSCU)<br/> Dong, Birong; Sichuan University West China Hospital, National Clinical Research Center for Geriatrics( WCHSCU)</p> |
| Keywords:                     | PUBLIC HEALTH, EPIDEMIOLOGY, GERIATRIC MEDICINE                                                                                                                                                                                                                                                                                                                                                                                                                                                                                                                                                                                                                                                                                                                                                                                                                                                                                                                                                                                                                                                                                                                                                                                       |
|                               |                                                                                                                                                                                                                                                                                                                                                                                                                                                                                                                                                                                                                                                                                                                                                                                                                                                                                                                                                                                                                                                                                                                                                                                                                                       |

SCHOLARONE™  
Manuscripts

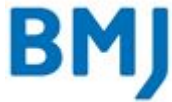

I, the Submitting Author has the right to grant and does grant on behalf of all authors of the Work (as defined in the below author licence), an exclusive licence and/or a non-exclusive licence for contributions from authors who are: i) UK Crown employees; ii) where BMJ has agreed a CC-BY licence shall apply, and/or iii) in accordance with the terms applicable for US Federal Government officers or employees acting as part of their official duties; on a worldwide, perpetual, irrevocable, royalty-free basis to BMJ Publishing Group Ltd ("BMJ") its licensees and where the relevant Journal is co-owned by BMJ to the co-owners of the Journal, to publish the Work in this journal and any other BMJ products and to exploit all rights, as set out in our [licence](#).

The Submitting Author accepts and understands that any supply made under these terms is made by BMJ to the Submitting Author unless you are acting as an employee on behalf of your employer or a postgraduate student of an affiliated institution which is paying any applicable article publishing charge ("APC") for Open Access articles. Where the Submitting Author wishes to make the Work available on an Open Access basis (and intends to pay the relevant APC), the terms of reuse of such Open Access shall be governed by a Creative Commons licence – details of these licences and which [Creative Commons](#) licence will apply to this Work are set out in our licence referred to above.

Other than as permitted in any relevant BMJ Author's Self Archiving Policies, I confirm this Work has not been accepted for publication elsewhere, is not being considered for publication elsewhere and does not duplicate material already published. I confirm all authors consent to publication of this Work and authorise the granting of this licence.

# Cohort Profile: A natural population cohort study on long-lived adults: West China Longevity and Aging Procedure (WCLAP)

## AUTHORS:

1. **Xiaochu WU** ; National Clinical Research Center for Geriatrics , West China Hospital , Sichuan University , Guoxue Road No.37, Chengdu, China; wuxiaochu123@126.com; +008613321425328.

2. **Yan Zhang** ; National Clinical Research Center for Geriatrics , West China Hospital , Sichuan University , Guoxue Road No.37, Chengdu, China; 942334572@qq.com; +008613281095992.

3. **Yan She**; Mei Shan Shi Peng Shan Qu Chinses Medicine Hospital, Jianshe Road No.58, Meishan City, China; 381385665@qq.com; +008613547668733.

4. **Li Wang**; Leshan People's Hospital, Baita Road No.238, Leshan, China; thewangli289@163.com; +008613320915736.

5. **Yanling Gao**; The Second People's Hospital of Yibin, West China Hospital of Sichuan University, Yibin Hospital, Beida Road No.96, Yibin, China; 1398079448@qq.com; +008618090968891.

6. **Yiping Deng**; National Clinical Research Center for Geriatrics , West China Hospital, Sichuan University, Guoxue Road No.37, Chengdu, China; niaoxuanhuaajing@126.com ; +008617391649348.

7. **Tianyao Zhang**; The No.1 Affiliated Hospital of Chengdu Medical College, Baoguang Street No.278, Chengdu, China; tianyaozhang123@163.com; +008615828294370.

8. **Meijuan Chen**; Leshan People's Hospital, Baita Road No.238, Leshan, China;

1  
2  
3  
4 12187342@qq.com; +008618283320808.  
5

6 **9. Yan He;** The Second People's Hospital of Yibin, West China Hospital of Sichuan  
7 University, Yibin Hospital, Beida Road No.96, Yibin, China; 510629664@qq.com;  
8 +008613547702862.  
9

10  
11  
12 **10. Xiaoyan Chen;** Zigong Fifth People's Hospital, Tongxing Road No.39, Zigong,  
13 China; 379531722@qq.com; +008618282388852.  
14

15  
16  
17 **11. Qiukui Hao;** National Clinical Research Center for Geriatrics , West China  
18 Hospital , Sichuan University , Guoxue Road No.37, Chengdu, China;  
19 haoqiukui@foxmail.com; +008618280096281.  
20  
21

22  
23  
24 **12. Jirong Yue;** National Clinical Research Center for Geriatrics , West China  
25 Hospital , Sichuan University , Guoxue Road No.37, Chengdu, China;  
26 yuejirong11@hotmail.com ; +008618980601143.  
27  
28  
29

30  
31 **CORRESPONDING AUTHOR:**  
32

33  
34 **Birong Dong;** National Clinical Research Center for Geriatrics , West China Hospital  
35 , Sichuan University , Guoxue Road No.37, Chengdu,China ;  
36 birongdong@163.com ;+008618980601332  
37  
38  
39

40  
41  
42  
43 **WORD COUNT: 4176 words.**  
44  
45  
46  
47  
48  
49  
50  
51  
52  
53  
54  
55  
56  
57  
58  
59  
60

## ABSTRACT

**Purpose:** The West China Longevity and Aging Procedure cohort study (WCLAP) aims to provide guidance for older adults in western China with the aim of improving quality of life, reducing the burden of family care, summarizing the characteristics of longevity lifestyles, building a Chinese-longevity-population biobank, and exploring the mechanisms underlying population aging.

**Participants:** Since the establishment of the WCLAP research baseline in 2018, a population of 1,537 adults aged 80 years and above, living in the community, have been enrolled in the program as research participants. Of these, 231 are aged 100 years and above. Participants are followed up every year.

**Finding to data:** WCLAP data is collected in 5 hospital research sub-centers strategically located adjacent to the national "Longevity Townships" of Chengdu Ziyang, Leshan, Yibin, and Pengshan. Data collection included a comprehensive assessment of the participant's health (including physical, psychological, social, common chronic disease assessments), instrumental tests (body composition and muscle percentage), and the collection of biomedical-biobank samples (include blood, urine, feces, hair, and urine).

**Future plans:** Through the annual cohort follow-up, survival-related information is collected at a group level. Analysis of biological samples facilitates biological characterization at the microscopic level through proteomics, metabolomics, genomics, and other techniques. Baseline data, group-level follow-up data, and microbiological examination data are integrated together to provide an evaluation tool, exploring sarcopenia, disability, dementia, caregiver burden, aging biomarkers, and other influencing factors.

**Registration:** The WCLAP was approved by the Medical Ethics Committee of the West China Hospital of Sichuan University (Reference Number: 2018-463), and registered with the China Clinical Trial Registration Center (Registration number:

1  
2  
3  
4 ChiCTR1900020754).

5  
6 **Keywords:** Natural population; Long-lived adults; Cohort study; Sarcopenia; Frailty;  
7  
8 Dementia.  
9

10  
11  
12  
13  
14  
15  
16  
17  
18  
19  
20  
21  
22  
23  
24  
25  
26  
27  
28  
29  
30  
31  
32  
33  
34  
35  
36  
37  
38  
39  
40  
41  
42  
43  
44  
45  
46  
47  
48  
49  
50  
51  
52  
53  
54  
55  
56  
57  
58  
59  
60

For peer review only

## INTRODUCTION

The increasing age of the population has become one of the main factors affecting the quality of life globally. As the elderly population increases, age-related chronic conditions contribute to the global healthcare burden and are anticipated to become the next global public health challenge[1] There is much research ongoing to determine how best to achieve healthy aging, improve quality of life in old age, and reduce the burden on family caregivers of elderly disabled relatives. As such, a great investment is being driven into the field of aging health in various countries. In 2018, the population of people aged over 64 surpassed that of children under 5 for the first time. By 2050, it is predicted that nearly 20% of the world's population will be over 65[2]. Consequently, the workforce in social production is likely to face increased life pressure and social responsibility. It is important to establish a balance between social burden and social productivity, and a good strategy is required to achieve this.

In 2000, China was acknowledged to have an aging society. A national survey conducted by the National Bureau of Statistics reported China's elderly population (defined as those aged 60 and over) to have reached 249 million at the end of 2018, comprising 17.9% of the total population; with those aged 65 and over numbering 167 million, accounting for 11.9% of the total population[3]. This rate of aging is projected to increase further to 24.7% in the next 25 years[4]. In 2010, Chinese scholars reported the total number of people over 60 to be 178 million, accounting for 13.32% of the total population and predicted that by 2030, this will reach 359 million. By 2050, the total number of people over 60 is estimated to reach 448 million, accounting for about 40% of the total population, with a serious impact on quality of life[5, 6]. In the future, with further advancements in technology and human intelligence, China is expected to face more severe consequences from this aging society.

The elderly population of longevity townships in China has different behavioral characteristics to those in Europe and America, including the variety and structure of dietary intake, economic level, educational background, psychological health (anxiety, depression), the provision of family care, and physical activity. The present research



1  
2  
3  
4 aims to focus on the behavioral characteristics associated with high-quality survival and  
5 longevity of the elderly population in China's longevity areas. This will be achieved by  
6 assessing the lifestyles at a large scale and the biological multi-omics at the microscopic  
7 scale. This study aims to summarize the characteristics associated with longevity in this  
8 special population of elderly Chinese people. By starting from the concept of primary  
9 prevention, this study aims to characterize behaviors associated with a long and healthy  
10 and longevity life, providing government departments with evidence supporting public  
11 health primary prevention strategies. Conversely, through the testing and analysis of  
12 biological samples with the help of metabolomics, proteomics, and other methods,  
13 biomarkers of healthy aging will be identified to provide a basis for the future  
14 development of anti-aging drugs and the treatment of age-related diseases.  
15  
16  
17  
18  
19  
20  
21  
22  
23  
24  
25  
26  
27

## 28 **COHORT DESCRIPTION**

### 29 **Study design and setting**

30  
31  
32  
33 The design and baseline of WCLAP were formed in 2017 and 2018, respectively, with  
34 the plan of conducting an annual cohort follow-up. WCLAP was designed to be a  
35 prospective dynamic cohort study across 4 medical and health institutions in the  
36 National Longevity Region in western China. From October 10, 2018, to December 1,  
37 2019, WCLAP successively established baseline research subcenters in five longevity  
38 regions in western China; Chengdu (The West China Hospital of Sichuan University),  
39 Ziyang (Ziyang Zhonghua Hospital), Leshan (The First People's Hospital of Leshan  
40 City), Meishan (Pengshan Traditional Chinese Medicine Hospital of Meishan City),  
41 and Yibin (The Second People's Hospital of Yibin City). The data collected by each  
42 sub-center were collated at the West China Hospital of Sichuan University (WCHSCU).  
43 All biological samples were collected according to standardized operational processes  
44 and stored in the biological specimen bank of the West China Hospital of Sichuan  
45 University.  
46  
47  
48  
49  
50  
51  
52  
53  
54  
55  
56  
57  
58  
59  
60

## Ethical approval

The WCLAP was approved by the Medical Ethics Committee of the West China Hospital of Sichuan University (Reference Number: 2018-463), and registered with the China Clinical Trial Registration Center (Registration number: ChiCTR1900020754).

## Data collection

Data collection comprised (1) the completion of a questionnaire survey, (2) a full physical examination, and (3) biological specimen collection and laboratory tests.

The design of the questionnaire was based on the National Health and Aging Trends Study (NHATS) created by the Johns Hopkins University[7] and applied to the population of western China. The contents of the questionnaire survey comprised basic demographic characteristics, social activity, family longevity, health and disease status, lifestyle behaviors, and evaluation scales. Before the formal use of the questionnaire, our team carried out pre-test among the old adult in the community to continuously verify the reliability and validity of the questionnaire, and finally confirmed the final version of the questionnaire tool.

The physical examination included measures of grip strength, pace, body mass index (BMI), blood pressure, skinfold thickness at the triceps, the sit-up test, and body composition. Before data collection, all test instruments were calibrated according to manufacturer guidelines.

Biological specimen collection for laboratory testing included blood, urine, stool, saliva, and hair. Subjects were provided with a free routine screening of their blood and urine samples within one month of their physical examination.

## Study subjects

Participants were recruited from the National Longevity Region in Western China. The

1  
2  
3  
4 eligibility criteria were as follows:  
5

- 6 1. Participants agreed to participate in the study and signed an informed consent form.
- 7
- 8 2. Participants were aged 80 years old or older (according to their identification card).
- 9
- 10 3. Participants had lived in the locality for at least 1 year.
- 11
- 12 4. Participants were willing and able to cooperate with the evaluator in the local
- 13 language to complete the 30-minute evaluation.
- 14
- 15
- 16
- 17

18 Exclusion criteria:  
19

- 20 1. Unwillingness to sign the informed consent form, complete all assessment content
- 21 independently.
- 22
- 23 2. The presence of metal implants in the body, such as stents, artificial joints, pins,
- 24 plates, or cardiac pacemakers.
- 25
- 26 3. Being under the age of 80 (according to their identification card).
- 27
- 28 4. Having a life expectancy of under 6 months (diagnosed by medical institution).
- 29
- 30
- 31
- 32
- 33
- 34
- 35
- 36
- 37
- 38

### 39 **Sampling method**

40  
41 A multi-stage cluster sampling method was used as follows:  
42

- 43 1. The study population comprised the population of elderly adults across the varied
- 44 topography and landforms of the national longevity area in western China, including
- 45 hills, basins, mountains, and plains.
- 46
- 47 2. Given the two factors of the geographical environment and the extent of the national
- 48 longevity areas, four cities in western China were selected as sub-centers for the study,
- 49 namely Meishan, Ziyang, Yibin, and Leshan.
- 50
- 51 3. Given the influence of many factors, including the convenience of transport routes,
- 52 the willingness of municipal/county/village-level government bodies to cooperate, the
- 53
- 54
- 55
- 56
- 57
- 58
- 59
- 60

1  
2  
3  
4 sizes of local populations, the distances between collection points and local sub-centers,  
5 and local acceptance of modern medicine, districts were selected adjacent to each sub-  
6 center. These were Pengshan District (adjacent to Meishan City), Yanjiang District  
7 (adjacent to Ziyang City), Cuiping District (adjacent to Yibin City), and Shizhong  
8 District (adjacent to Leshan City).  
9  
10  
11  
12

13  
14 4. In each of the above districts, a number of towns (10 towns from Pengshan, 17 towns  
15 from Yanjiang, 12 towns from Cuiping, 12 towns from Shizhong) were randomly  
16 selected based on factors such as accessibility, population size and structure.  
17  
18  
19

20  
21 5. Data collection was conducted at each research site, facilitated by preliminary  
22 communication with government departments, sub-centers, and community  
23 organizations at all levels of the project site, to initiate social mobilization and publicity  
24 for the study. Residents of each of the selected towns were invited to voluntarily  
25 participate in the study. Our team will provide each participant with free medical  
26 examination service (about 90 USD) and long-term health follow-up service (free  
27 hospital referral service will be provided if necessary) as compensation.  
28  
29  
30  
31  
32  
33  
34

### 35 **Baseline evaluation**

36  
37 The baseline assessment was completed in 2019, whereby 1,546 elderly adults  
38 participated. The baseline assessment included the survey, biological sample collection,  
39 and physical examination as detailed above.  
40  
41  
42

43  
44 The questionnaire included basic personal information, information about social and  
45 support networks, social microenvironment, religious beliefs, family longevity, chronic  
46 disease, health self-assessment, eating habits, household drinking water, smoking status,  
47 alcohol/tea intake, physical exercise, and daily and leisure activity. This was achieved  
48 using validated assessment tools, and where possible those designed specifically for use  
49 in elderly populations; Activities of Daily Living (ADL), Instrumental Activities of  
50 Daily Living (IADL), Clinical Frailty Scale, Social Support Rating Scale (SSRS),  
51 Pittsburgh Sleep Quality Index (PSQI), the short form of the multi-nutritional  
52 assessment (MNA-SF), mini mental-state exam (MMSE), the Generalized Anxiety  
53  
54  
55  
56  
57  
58  
59  
60

Disorder questionnaire (GAD-7) and the Geriatric Depression Scale (GDS-15). The questionnaire contents are detailed in Table 1.

**Table 1: The main contents of the questionnaire survey**

| Questionnaire Frame        | Content Description                                                                                                                                                                                                                                           |
|----------------------------|---------------------------------------------------------------------------------------------------------------------------------------------------------------------------------------------------------------------------------------------------------------|
| Basic personal information | Name, gender, age, ID number, place of birth, length of local residence, local residential address, telephone number (her/himself + relatives), Educational background, nationality, language (minority language), main occupation before 60 years old, etc.. |
| Social network & support   | Childbirth (number of sons and daughters), family situation, family financial control, family respect, home care, family function, neighbor/friend relationship, support and assistance, marriage/spouse situation, etc.                                      |
| SRSS Scale                 | Social support evaluation, including friends, neighbors, family, asking for help, talking, etc.                                                                                                                                                               |
| Social microenvironment    | Family living area, source of income, annual family income, and economic satisfaction.                                                                                                                                                                        |
| Religious belief           | Religious type, religious activities                                                                                                                                                                                                                          |
| Longevity Family Survey    | Long-lived relatives, family history of genetic disease                                                                                                                                                                                                       |
| History of chronic disease | Types of chronic diseases, hospitalization, medical insurance, medical expenses in the past year, satisfaction with medical conditions, timely medical treatment, etc.                                                                                        |
| Health self-assessment     | Limitation of activity, physical state, emotional state, pain, self-feeling, etc.                                                                                                                                                                             |
| Eating habits              | The number of meals per day, the amount of food, the                                                                                                                                                                                                          |

|                          |                                                                                                                                                           |
|--------------------------|-----------------------------------------------------------------------------------------------------------------------------------------------------------|
|                          | combination of meals, whether or not breakfast, salt intake, cooking methods, eating speed, taste preference and dietary intake structure/frequency/type. |
| MNA-SF Scale             | BMI, psychology, calf circumference, mid-arm circumference diet, etc.                                                                                     |
| Household drinking water | Type/source of drinking water.                                                                                                                            |
| Smoking                  | Smoking history, age of first smoking, cigarette type, smoking cessation history, smoking status of family members, second-hand smoke inhalation status.  |
| Alcohol intake           | Drinking history, first drinking age, drinking frequency and type.                                                                                        |
| Tea intake               | Whether to drink tea now and in the past, age of first drinking, tea type, daily intake (ml).                                                             |
| Physical exercise        | Whether physical exercise is performed now and in the past, age at physical exercise start and end.                                                       |
| Daily & Leisure activity | Housework, farming, raising poultry, reading, playing mahjong, TV, radio, chat in teahouses, etc.                                                         |
| ADL Scale                | Daily living ability assessment, including eating, walking, dressing, bathing, etc.                                                                       |
| IADL Scale               | Instrumental assessment of activities of daily living, including cooking, taking medicine, shopping, calling, etc.                                        |
| Frail Scale              | Fatigue, endurance, walking, illness, weight loss.                                                                                                        |
| PSQI Scale               | Sleep assessment                                                                                                                                          |
| MMSE Scale               | Cognitive function assessment, including orientation, memory, attention, calculation, meeting ability, language ability.                                  |

|              |                                                                                                                       |
|--------------|-----------------------------------------------------------------------------------------------------------------------|
| GAD-7 Scale  | Anxiety assessment, including nervousness, worry, irritability, fear, etc.                                            |
| GDS-15 Scale | Depression assessment, including feelings of helplessness, memory, getting help, difficulty, boredom, emptiness, etc. |

*Note:* SSRS, Social Support Rating Scale ;MNA-SF, Mini Nutritional Assessment-Short Form;ADL, Activities of Daily Living; IADL, Instrumental Activities of Daily Living;PSQI, Pittsburgh Sleep Quality Index;MMSE, Mini-mental State Examination ;GAD-7, Generalized Anxiety Disorder-7; GDS-15, Geriatric Depression Scale-15.

Biological samples were collected from participants, and in return they received a free routine blood and urine screening including liver and kidney function tests. All specimens were pre-processed on the day of collection. For convenience, samples were labelled with the participant's basic information, including their sample number, name, gender, and age. All specimens except hair specimens were stored temporarily at 4°C before being moved (using dry ice to ensure ultra-low temperature refrigeration throughout the transportation) to the main -80°C storage facility at the Biological Specimen Bank of West China Hospital of Sichuan University. The description of the specimen pre-processing procedure and long-term storage conditions at each sub-center are shown in Table 2.

**Table 2: Specimen pre-processing procedure and long-term storage conditions**

| Sample Type | Pre-Process Standard Method                                                                                                                                                             | Storage Condition                         |
|-------------|-----------------------------------------------------------------------------------------------------------------------------------------------------------------------------------------|-------------------------------------------|
| Blood       | 2 tubes (5ml/tube) of blood per person were collected, which had been centrifuged by 3500 rpm in 15 minutes, and divided into 8 EP tubes (2 tubes of albuginea and 6 tubes of plasma ). | -80°C ultra-low temperature refrigerator. |

|        |                                                                                                            |                                           |
|--------|------------------------------------------------------------------------------------------------------------|-------------------------------------------|
| Urine  | On the day of collection, the urine was divided into 2 EP tubes (2 ml and 15 ml each) at room temperature. | -80°C ultra-low temperature refrigerator. |
| Stool  | Take a small amount, place in the preservation solution, and mix well.                                     | -80°C ultra-low temperature refrigerator. |
| Saliva | Centrifuge, 2500 rpm, 1 minute, the supernatant and residue were placed in two 5ml pointed EP tubes.       | -80°C ultra-low temperature refrigerator. |
| Hair   | Put 10-20 hairs (10 cm/piece) in a sealed bag.                                                             | Store at room temperature.                |

*Note:* All EP tubes are suitable for ultra-low temperature storage.

A full physical examination was conducted to characterize the basic physical fitness level and incidence of age-related disease (such as sarcopenia) in the study population. The procedure for the full physical examination is shown in Table 3.

**Table 3: Physical examination procedure**

|                    | Item                    | Description                                                                                                           |
|--------------------|-------------------------|-----------------------------------------------------------------------------------------------------------------------|
| Physical condition | Height                  | Stand up straight, measure 2 times in a row, and ask about last year's weight                                         |
|                    | Weight                  | Take off the coat and other heavy clothes, repeat the measurement twice.                                              |
|                    | Upper arm circumference | Measure the circumference of the upper arm at the midpoint of the line between the shoulder and the elbow, repeat the |



|                           |                                           |                                                                                                                                                                                     |
|---------------------------|-------------------------------------------|-------------------------------------------------------------------------------------------------------------------------------------------------------------------------------------|
|                           |                                           | measurement twice.                                                                                                                                                                  |
|                           | Triceps skinfold thickness                | Use a cortical thickness gauge to measure the fat thickness at the midpoint of the shoulder and elbow joint, repeat the measurement twice.                                          |
|                           | Calf circumference                        | Keep leg upright, measure the circumference of the thickest part of the calf, repeat the measurement twice.                                                                         |
|                           | Waist circumference                       | Measure the waist circumference at a point 2 cm above the belly button, repeat the measurement twice.                                                                               |
|                           | Hip circumference                         | The circumference between the symphysis pubis and the most convex part of the back gluteus maximus, repeat the measurement twice.                                                   |
|                           | Knee height                               | The length between the knee joint and the heel, repeat the measurement twice.                                                                                                       |
|                           | Finger distance                           | The length between the index fingers of both hands, repeat the measurement twice.                                                                                                   |
| Disease related condition | Blood pressure& Pulse                     | After sitting and resting for 2-5 minutes, start the measurement, record the diastolic and systolic blood pressure (electronic sphygmomanometer), and repeat the measurement twice. |
|                           | Electrocardiogram bioelectrical impedance | After confirming that there is no metal in the participant's body, use INBODY S10                                                                                                   |

|  |                      |                                                                                                                                                                                                                    |
|--|----------------------|--------------------------------------------------------------------------------------------------------------------------------------------------------------------------------------------------------------------|
|  | analysis (BIA)       | (BioSpace, Seoul, Korea) to measure the BIA data, enter the participant's information into the host, adopt a sitting posture, and connect all limbs with electrodes. No talking is allowed during the measurement. |
|  | Gait speed (s/m)     | Measure the pace of the participants and calculate the pace (seconds/meter) at the start and end times of 3 segments of 4 meters.                                                                                  |
|  | Grip strength        | Ask the participant's habit of using hands and test the grip strength of both hands twice.                                                                                                                         |
|  | Balance test         | Participants were tested for balance in three stances, including feet side by side, staggered feet, and front and rear feet. Each stance held for 10 seconds was deemed qualified.                                 |
|  | Blood sugar          | Fingertip blood sugar test.                                                                                                                                                                                        |
|  | Sit-up ability tests | Participants hold their shoulders, complete 1 and 5 consecutive sit-up tests respectively, and record the completion status (whether it can be completed and when it is completed).                                |

### Measurement of key variables

#### Mental state and cognitive assessment

The assessment of the psychological state mainly comprised the evaluation of anxiety and depression in participants using the GAD-7 and GDS-15 assessment tools, respectively. The GAD-7 comprises 7 questions to assess the participant's generalized anxiety in the past 2 weeks. The GAD-7 scale[8] is scored from 0 to 21, with a higher

1  
2  
3  
4 score representing a more severe anxiety level. The evaluation standards are 0-4 points  
5 signifying a normal level, 5-9 points for mild anxiety, 10-14 points for moderate anxiety,  
6 and 15-21 points signifying severe anxiety. The GDS-15 scale[9] is used in the  
7 evaluation of depression in elderly adults over the past week. The scale consists of 4  
8 questions that are scored directly and 11 reverse-scored questions. Again, a higher score  
9 represents the more severe depression. The evaluation standards are 0-4 signifying a  
10 normal level, 5-8 for mild depression, 9-11 for moderate depression, and 12-15  
11 signifying severe depression.  
12  
13  
14  
15  
16  
17  
18  
19

20 Considering the characteristics of China's elderly population, such as low education  
21 level, poor economic level, and the need for an assessment that was easy to administer,  
22 this study used the MMSE[10] to evaluate cognitive function. The MMSE scale  
23 evaluates participants' orientation, memory, recall ability, language ability, attention,  
24 and calculation ability through 30 questions. The highest achievable score is 30, with  
25 scores of 0-26 points representing cognitive dysfunction.  
26  
27  
28  
29  
30  
31

### 32 **Sarcopenia**

33  
34  
35 Following the recommendations of the "Asian Working Group for Sarcopenia: 2019  
36 Consensus Update on Sarcopenia Diagnosis and Treatment", the assessment of  
37 sarcopenia in used this study mainly comprised the measurement of grip strength, pace,  
38 and Bioelectrical Impedance Analysis (BIA; Inbody S10, BioSpace, Seoul, Korea).  
39 Previous studies have shown no statistical differences between the use of magnetic  
40 resonance imaging (MRI) and BIA for the assessment of sarcopenia[11]. Muscle mass  
41 was defined using the appendicular skeletal muscle mass index (ASMI), calculated  
42 similarly to BMI, using the formula, appendicular skeletal mass (ASM) / height<sup>2</sup>. A  
43 threshold of 7.0 kg/m<sup>2</sup> in men and 5.7 kg/m<sup>2</sup> in women was considered to signify low  
44 muscle mass. Low grip strength for men and women was defined as 26 kg and 18 kg,  
45 respectively[12]. The participant's usual walking speed was measured over 4 m, with a  
46 gait speed of less than 0.8 m/s considered to signify sarcopenia[13].  
47  
48  
49  
50  
51  
52  
53  
54  
55  
56  
57  
58

### 59 **Activities of daily life**

1  
2  
3  
4 Participants' daily living activity assessment used health self-assessment measures  
5 (body, emotion, feeling) together with the ADL (level of basic self-care) and IADL  
6 (ability to use basic appliances) scales[14]. Based on previous research findings, we  
7  
8 additionally used some simple, independently-designed health self-evaluation  
9  
10 questions covering the previous month of the participant's life condition, including  
11  
12 overall self-evaluation, limitations of the ability to undertake activity, the impact of  
13  
14 health status on daily life, the impact of emotional status on daily life, pain status, self-  
15  
16 assessed psychological state, the influence of health and mental state on daily social  
17  
18 interaction, and other issues.  
19  
20

21  
22 The ADL scale assesses participants' ability to take care of themselves by asking the  
23  
24 ability of participants to defecate, urinate, groom, use the toilet, eat, move, dress, use  
25  
26 the stairs, and bathe. The full scale of the scale comprises 100 points, with 100 points  
27  
28 representing perfect ability with no need to rely on others; 61-99 points representing a  
29  
30 mild dysfunction, but basically having the ability to take care of themselves; 41-60  
31  
32 points representing moderate dysfunction, and needing some help; 21-40 points  
33  
34 representing severe dysfunction and needing to be dependent on others; and less than  
35  
36 20 points representing complete dependence on others.  
37

38 The IADL scale comprehensively evaluates the participants' ability to use basic  
39  
40 appliances. The evaluation content includes cooking, housework, taking medicine,  
41  
42 walking, shopping, financial management, using the telephone, and washing clothes.  
43  
44 The scale has a maximum score of 16, with a score of less than 8 indicating impaired  
45  
46 instrumental life ability.  
47

### 48 **Sleep quality**

49

50  
51 The PSQI scale[15] is used to evaluate the sleep of participants through sleep quality,  
52  
53 the time taken to fall asleep, duration of sleep, sleep efficiency, sleep disorders, use of  
54  
55 hypnotic drugs, and daytime dysfunction. The scale has a maximum score of 21 points,  
56  
57 with a score of 0-5 representing the best sleep quality; 6-10 good sleep quality; 11-15  
58  
59 average sleep quality; and 16-21 poor sleep quality. In addition, we also asked questions  
60

1  
2  
3  
4 about “siesta”/napping and the Sleep Self-Assessment.  
5

### 6 **Medical history and social support** 7

8  
9 Participants were asked to provide a full medical history of chronic diseases (diagnosed  
10 by professional medical institutions), including cardiovascular and cerebrovascular  
11 diseases, respiratory diseases, nervous system diseases, hearing disorders, bone and  
12 joint diseases, liver and kidney diseases, and incontinence. The assessor asked about  
13 the symptoms experienced, including whether the participant was ill, the number of  
14 years they experienced the illness, and the treatment undertaken.  
15  
16  
17  
18  
19

20  
21 The SSRS[16] was used to evaluate the social support of the participants through factors  
22 such as the social interaction between the participants and friends, neighbors, family  
23 members, and social groups. The maximum score of this scale is 40 points, with a  
24 higher score representing better social support. A score of 30-40 was considered to  
25 represent a good degree of social support; a score of 20-29 a general degree of social  
26 support; and a score of less than 20 a lower degree of social support. In addition, we  
27 investigated the family microenvironment, including the housing structure, family  
28 economic control/discourse power, family respect, family decision-making, family  
29 support, family conflict response, and spousal relationship.  
30  
31  
32  
33  
34  
35  
36  
37  
38

### 39 **Nutrition and behavior** 40

41  
42 The MNA-SF[17] was used to conduct a nutritional assessment. This assessment tool  
43 consists of two sections, with all participants completing the first section and  
44 participants only progressing to the second section if they scored less than 11 points on  
45 the first, indicating possible malnutrition. A combined score (scores from both sections  
46 added together) of greater than 24 points was interpreted as a good nutritional status;  
47 17-23.5 points was interpreted as a risk of malnutrition; and a score of less than 17  
48 indicated the definite presence of malnutrition.  
49  
50  
51  
52  
53  
54

55  
56 In addition, based on the characteristics of the traditional Chinese diet and previous  
57 research findings, we independently designed a series of survey questions related to  
58  
59  
60

1  
2  
3  
4 eating habits, diet types, and the frequency with which they ate certain foods. The  
5 survey of eating habits included the number of meals per day, meal times, the amount  
6 eaten at each meal, the types of food eaten at each meal (meat and vegetables), breakfast,  
7 flavorings, cooking methods, and speed of eating. Dietary content was assessed by  
8 asking how frequently (i.e. daily, 3-5 times a week, 1-2 times a week, 1-3 times a  
9 month, or never) participants consumed grains, vegetables, fruits, meat, eggs, seafood,  
10 dairy products, vegetable oil, animal oil, nuts, candy, cakes, etc.  
11  
12  
13  
14  
15  
16  
17

18 Participant behavior was captured by asking about smoking, alcohol intake, tea intake,  
19 physical labor, and leisure activities. Participants were asked whether they smoke (at  
20 least one cigarette per day for more than 6 months), for how many years, what type of  
21 cigarettes, how many cigarettes per day, whether they had attempted to quit smoking,  
22 whether they experienced second-hand smoke inhalation, and how often. Similarly,  
23 alcohol consumption was defined as drinking alcohol at least once a week. Participants  
24 were asked at what age they started drinking alcohol, their drinking frequency, type of  
25 alcohol consumed, and the volume of a single drink. Participants were asked if they  
26 drank tea frequently (more than 3 times a week), whether their habits had been different  
27 in the past, the age they started drinking tea, the type of tea, and the amount of tea  
28 consumed daily.  
29  
30  
31  
32  
33  
34  
35  
36  
37  
38  
39

40 Manual labor was assessed by asking participants whether they undertake moderate or  
41 severe manual labor, the number of days they did this per week, and the number of  
42 hours per day. Leisure activities were captured including growing vegetables, raising  
43 poultry, raising pets, reading books and newspapers, educational activities (Mahjong,  
44 etc.), watching television or listening to the radio, socializing in tea houses, etc.  
45  
46  
47  
48  
49

### 50 **Follow-up**

51  
52  
53 The follow-up tool was designed taking into account the characteristics/results of the  
54 baseline data (October 2018-December 2019), key issues (frailty, cognition, disability,  
55 sarcopenia, psychology, etc.), and follow-up methods (phone or face-to-face follow-  
56 up). In 2020, the follow-up work needed to incorporate further external factors such as  
57  
58  
59  
60

1  
2  
3  
4 COVID-19, and the government's policy response. The initial plan was to conduct a  
5  
6 telephone follow-up with all participants recruited at baseline. Later, depending on the  
7  
8 COVID-19 situation in China, it may be possible to conduct an in-person follow-up.  
9

10  
11 The telephone follow-up comprised a phone call of no longer than 10 minutes. For any  
12  
13 participants who had died, the investigator recorded the date of death, cause of death,  
14  
15 and other information, and comforted the family members of the deceased. For  
16  
17 participants with the wrong phone number, the investigator tried to contact their family  
18  
19 members or community staff to minimize the rate of loss to follow-up. For participants  
20  
21 who were temporarily unavailable/busy, the investigator re-attempted contact on at  
22  
23 least 5 occasions at different times of the working day/week/weekend. Telephone  
24  
25 follow-up investigators were mostly medical college students, and all received  
26  
27 comprehensive training.

28  
29 Following completion of the telephone follow-up on all participants recruited at  
30  
31 baseline, the attrition rate of the study was assessed. Then, according to the sample size  
32  
33 requirements of the prospective dynamic cohort study, new participants were recruited  
34  
35 to join the cohort, in line with the recruitment criteria outlined above.

### 36 37 **Data quality control and management**

38  
39 Due to the participants being over 80 years old, and the locations of longevity areas  
40  
41 being typically in marginal mountainous areas, this study chose to conduct data capture  
42  
43 using paper questionnaires. Paper questionnaires were verified on the day of data  
44  
45 collection. 30-50% of the questionnaires were randomly selected for verification by two  
46  
47 independent investigators on the same day. Any missing or ambiguous responses were  
48  
49 confirmed by the investigator telephoning the participant.

50  
51 The database was established using Epidata3.0. Independent double entry was used,  
52  
53 and the two independent databases were compared using the "consistency check"  
54  
55 function of the software. Any inconsistencies between the two databases were modified  
56  
57 on a case-by-case basis until the two databases were completely consistent.

58  
59 All biological specimens were pre-processed and marked on the day of collection  
60

1  
2  
3  
4 (adding marking information, such as name, gender, age, and code, etc., based on the  
5 original barcode and QR code of each cryopreservation tube), and stored in the ultra-  
6 low temperature refrigerator Medium (-80 degrees Celsius). The transport conditions  
7 of biological specimens in intra-city were with the help of a transfer box, which was  
8 kept at 4 degrees Celsius to avoid hemolysis of biological specimens; for the transfer  
9 of biological specimens between cities, dry ice was used to maintain an ultra-low  
10 temperature environment, and the entire process of transport had a temperature control  
11 record; all biological specimens According to ethical requirements, were stored in the  
12 biological specimen bank of West China Hospital of Sichuan University for long-term  
13 preservation. At the same time, after each transfer was completed, whether it was intra-  
14 city transfer or inter-city transfer, random inspections (1-3%) of the location  
15 information of cryopreservation tubes were required to ensure that the storage location  
16 of biological specimens will not change due to the transfer work. (Change, move and  
17 loss of storage location information, etc.).

18  
19  
20  
21  
22  
23  
24  
25  
26  
27  
28  
29  
30  
31 All evaluation results would be fed back to the person or family members within one  
32 month, laying a good foundation of trust for the next follow-up work.

33  
34  
35  
36  
37  
38  
39  
40  
41  
42  
43  
44  
45  
46  
47  
48  
49  
50  
51  
52  
53  
54  
55  
56  
57  
58  
59  
60  
The Principal Investigator (PI) has overall responsibility for data management, including data storage, application, and use. The data management plan follows guidance on medical ethics, fairness, and bias. Therefore, before using the data, the data was de-identified by removing sensitive information such as the fields of participant name, gender, age, identification number, and home address.

## **PATIENT AND PUBLIC INVOLVEMENT**

No patient involved.

## **STATISTICAL STRATEGY AND FINDINGS TO DATE**

Data analyses were conducted using SPSS version 22.0 and R 3.6.1. Descriptive statistical analyses were conducted on longevity-related characteristics and medical



examination data to provide percentages, means, and standard deviations. For interrogation of independent samples by region, gender, ages, and disease, chi-squared tests were used. If the conditions for using chi-squared tests were not met, the Fisher test was used instead. For variables such as scores on any of the psychometric or behavioral scales, the rank-sum test was used.

Participant characteristics are displayed in Table 4.

**Table 4: Participant characteristics**

| Characteristics                             | All<br>(n=1537) | Men<br>(n=643) | Women<br>(n=894) | P value | Missing<br>number |
|---------------------------------------------|-----------------|----------------|------------------|---------|-------------------|
| <b>Age(years), mean(<math>\pm</math>SD)</b> | 88.7 (7.36)     | 87.7 (6.39)    | 89.40 (7.91)     | <0.001  | 1                 |
| <b>80-85</b>                                | 682 (44.4)      | 295 (46.0)     | 387 (43.3)       | <0.001  | 1                 |
| <b>86-90</b>                                | 293 (19.1)      | 142 (22.1)     | 151 (16.9)       |         |                   |
| <b>91-99</b>                                | 328 (21.4)      | 150 (23.4)     | 178 (19.9)       |         |                   |
| <b><math>\geq</math>100</b>                 | 233 (15.2)      | 55 (8.6)       | 178 (19.9)       |         |                   |
| <b>Ethnics, n (%)</b>                       |                 |                |                  |         | 3                 |
| <b>Han</b>                                  | 1530 (99.7)     | 639 (99.7)     | 891 (99.8)       |         |                   |
| <b>Others</b>                               | 4 (0.3)         | 2 (0.4)        | 2 (0.2)          |         |                   |
| <b>Educational level, n (%)</b>             |                 |                |                  | <0.001  | 6                 |
| <b>No formal education</b>                  | 915 (59.8)      | 232 (36.3)     | 683 (76.6)       |         |                   |
| <b>Elementary school</b>                    | 432 (28.2)      | 281(44.0)      | 151 (16.9)       |         |                   |
| <b>Middle school</b>                        | 98 (6.4)        | 66 (10.3)      | 32 (3.6)         |         |                   |
| <b>Technical secondary school</b>           | 35(2.3)         | 23(3.6)        | 12(1.3)          |         |                   |
| <b>High school and above</b>                | 51 (3.3)        | 37(5.8)        | 14 (1.6)         |         |                   |
| <b>Status of spouse, n (%)</b>              |                 |                |                  | <0.001  | 20                |
| <b>Alive</b>                                | 512 (33.8)      | 352(55.3)      | 160 (18.2)       |         |                   |
| <b>Divorced</b>                             | 5 (0.3)         | 2 (0.3)        | 3 (0.3)          |         |                   |

|                                                  |     |              |              |              |        |     |
|--------------------------------------------------|-----|--------------|--------------|--------------|--------|-----|
| <b>Widowed</b>                                   |     | 1000 (65.9)  | 282 (44.3)   | 718 (81.5)   |        |     |
| <b>Annual household income per capita, n (%)</b> |     |              |              |              |        | 8   |
| <b>&lt; 1000 rmb/year</b>                        |     | 77(5.0)      | 32(5.0)      | 45(5.1)      |        |     |
| <b>1000-3000 rmb/year</b>                        |     | 299(19.6)    | 121(18.9)    | 178(20.0)    |        |     |
| <b>3001-6000 rmb/year</b>                        |     | 257(16.8)    | 101(15.8)    | 156(17.5)    |        |     |
| <b>6001-8000 rmb/year</b>                        |     | 104(6.8)     | 41(6.4)      | 63(7.1)      |        |     |
| <b>8001-10000 rmb/year</b>                       |     | 75(4.9)      | 29(4.5)      | 46(5.2)      |        |     |
| <b>&gt; 10000 rmb/year</b>                       |     | 582 ( 38.1 ) | 269 ( 42.1 ) | 313 ( 35.2 ) |        |     |
| <b>Unknown</b>                                   |     | 135 ( 8.8 )  | 46 ( 7.2 )   | 89 ( 10.0 )  |        |     |
| <b>Anthropometric measures</b>                   |     |              |              |              |        |     |
| <b>Height (cm)</b>                               |     | 148.4 (10.7) | 156.1 (7.7)  | 142.8 (8.9)  | <0.001 | 12  |
| <b>Weight(kg)</b>                                |     | 49.4 (10.4)  | 54.3 (9.8)   | 45.9 (9.4)   | <0.001 | 12  |
| <b>BMI (kg/m<sup>2</sup>)</b>                    |     | 22.3 (3.7)   | 22.2 (3.3)   | 22.4 (4.0)   | <0.001 | 15  |
| <b>Underweight (&lt;18.5)</b>                    |     | 201 (13.2)   | 62 (9.7)     | 139 (15.7)   |        |     |
| <b>Normal (18.5–24.0)</b>                        |     | 863 (56.7)   | 391 (61.2)   | 472 (53.4)   |        |     |
| <b>Overweight (24.0-27.9)</b>                    |     | 356 (23.4)   | 158 (24.7)   | 198 (22.4)   |        |     |
| <b>Obese (&gt; 28.0)</b>                         |     | 103 (6.8)    | 28 (4.4)     | 75 (8.5)     |        |     |
| <b>Grip strength</b>                             |     | 17.5 (11.2)  | 22.2 (11.0)  | 14.0 (10.0)  | <0.001 | 47  |
| <b>4-meter gait speed</b>                        |     | 0.58 (0.23)  | 0.63 (0.22)  | 0.58 (0.23)  | <0.001 | 103 |
| <b>Life-styles</b>                               |     |              |              |              |        |     |
| <b>Drinking tea history</b>                      | Yes | 435 (28.4)   | 329 (51.4)   | 106 (11.9)   | <0.001 | 6   |
|                                                  | No  | 1096 (71.6)  | 311 (48.6)   | 785 (88.1)   |        |     |
| <b>Drinking alcohol history</b>                  | Yes | 476 (31.1)   | 196 (46.2)   | 180 (20.2)   | <0.001 | 6   |
|                                                  | No  | 1055 (68.9)  | 344 (53.8)   | 711 (79.8)   |        |     |
| <b>Smoking history</b>                           | Yes | 429 (28.1)   | 332 (52.1)   | 97 (10.9)    | <0.001 | 9   |

|                                     | No | 1099 (71.9) | 305 (47.9)  | 794 (89.1)  |        |     |
|-------------------------------------|----|-------------|-------------|-------------|--------|-----|
| <b>Scale evaluation</b>             |    |             |             |             |        |     |
| <b>ADL scale result</b>             |    | 93.3 (14.3) | 95.3 (12.0) | 91.9 (15.6) | <0.001 | 17  |
| <b>Good (100 points)</b>            |    | 934 (61.7)  | 443 (70.0)  | 491(55.7)   |        |     |
| <b>Mild dysfunction (&gt;60)</b>    |    | 514 (33.9)  | 170 (26.9)  | 344 (39.0)  |        |     |
| <b>Moderate dysfunction (41-60)</b> |    | 36 (2.4)    | 12 (1.9)    | 24 (2.7)    |        |     |
| <b>Severe dysfunction (21-40)</b>   |    | 17 (1.1)    | 4 (0.6)     | 13 (1.5)    |        |     |
| <b>Completely disabled (&lt;20)</b> |    | 14 (0.9)    | 4 (0.6)     | 10 (1.1)    |        |     |
| <b>IADL scale result</b>            |    | 11.4 (4.6)  | 12.1 (4.2)  | 10.9 (4.9)  | <0.001 | 16  |
| <b>Good function (≥8)</b>           |    | 1214 (79.8) | 542 (85.6)  | 672 (75.7)  |        |     |
| <b>Impaired function (&lt; 20)</b>  |    | 307 (20.2)  | 91 (14.4)   | 216 (24.3)  |        |     |
| <b>MMSE scale result</b>            |    | 16.3 (8.1)  | 19.0 (7.7)  | 14.3 (7.7)  | <0.001 | 174 |
| <b>normal</b>                       |    | 151 (11.1)  | 100 (17.3)  | 51 (6.5)    |        |     |
| <b>Cognitive Impairment</b>         |    | 1212 (88.9) | 478 (82.7)  | 734 (93.5)  |        |     |

## STRENGTHS AND LIMITATIONS OF THIS STUDY

### Strengths

The first multi-center study conducted in the elderly Chinese people living in Longevity Townships.

Exploring longevity-related behaviors in western China, and characterizing chronic diseases incident in this population (sarcopenia, disability, mild cognitive impairment; MCI, frailty, etc.) and the present prevalence of these diseases.

Establishing a biological sample bank of people living in these areas, and plan to find and verify longevity-related biomarkers by multi-omics.

### Limitations

1  
2  
3  
4 Much of the data is collected through self-report, creating a potential for recall bias. To  
5 counter this, data evaluators underwent comprehensive training, but there may still be  
6 investigator bias in the evaluation stage.  
7  
8

9  
10 The target population of this research is elderly adults, so a selective survival bias may  
11 exist in the disease epidemiological aspects of the research, as may the loss to follow-  
12 up bias.  
13  
14  
15

## 16 17 18 19 **COLLABORATION**

20  
21 Welcome geriatric medicine and longevity related researchers through our center  
22 website (<http://www.wchscu.cn/scientific/clinical/platform/55440.html>) for more data  
23 information (Database name: A natural cohort study of the old adult), if researchers  
24 have any requirements, you can also contact us by E-Mail ( [hxncrcg@163.com](mailto:hxncrcg@163.com)) for  
25 more details and cooperation.  
26  
27  
28  
29  
30  
31

## 32 33 34 35 **FUTURE DETAILS**

36  
37 It is planned to continue to carry out annual participant follow-up and collection of  
38 biological samples. Participants in the existing cohort will be followed up continuously,  
39 and new participants will be recruited into the prospective dynamic cohort study based  
40 on maintaining a constant sample size (i.e. to compensate for dropout). Participants  
41 who did not have the opportunity to contribute biological samples at the baseline time  
42 point will be followed up as soon as possible, and annual sample collections will occur  
43 as appropriate.  
44  
45  
46  
47  
48  
49

50  
51 Biological samples (blood, urine, saliva, stool) from participants will be analyzed using  
52 proteomics, metabolomics, and other techniques as outlined above. Results from these  
53 analyses will then be combined with the questionnaire and physical examination data  
54 to identify biomarkers of longevity, healthy lifestyle factors, and health-related factors.  
55  
56  
57  
58  
59  
60

1  
2  
3  
4 The findings of these complex analyses will be exploited for any factors that can be  
5 translated into community benefit. With reference to China's aging society, non-  
6 pharmaceutical health intervention and promotion programs will be explored and  
7 formulated with the intention of meeting the needs of the current and future Chinese  
8 population. We will propose primary prevention measures suitable for community  
9 health promotion, which will be beneficial for a healthy lifestyle, incorporating what  
10 we have learned about the behaviors of the elderly Chinese inhabitants of Longevity  
11 Townships.  
12  
13  
14  
15  
16  
17  
18  
19

## 20 **ACKNOWLEDGEMENTS**

21  
22 We would like to thank Pengshan District Hospital of Traditional Chinese Medicine,  
23 Yibin Second People's Hospital, Leshan People's Hospital and Ziyang Zhonghua  
24 Hospital for their strong support and assistance in this study.  
25  
26  
27  
28

## 29 **CONTRIBUTORS**

30  
31 All the authors have made important contributions to this paper and have provided  
32 potential intellectual support for this cohort profile.  
33  
34  
35

## 36 **FUNDING**

- 37  
38 1. 1.3.5 project for disciplines of excellence, West China Hospital, Sichuan University  
39 (ZY2017201).  
40  
41
- 42  
43 2. Project of Max Cynader Academy of Brain Workstation, West China Hospital,  
44 Sichuan University (HXYS19005).  
45  
46
- 47  
48 3. National Key R&D Program of China ( 2018YFC2000305 ) .  
49  
50

## 51 **Disclaimer**

52  
53 Our sources of funding had no role in the design of cohort profile, and will not be any  
54 impact on data collection, analysis, writing and decision to submit or publish the  
55 research results.  
56  
57  
58  
59  
60

1  
2  
3  
4 **COMPETING INTERESTS**  
5

6 None.  
7

8  
9 **PATIENT AND PUBLIC INVOLVEMENT STATEMENT**  
10

11 It was not appropriate or possible to involve patients or the public in the design, or  
12 conduct, or reporting, or dissemination plans of our research.  
13  
14  
15  
16  
17  
18  
19  
20  
21  
22  
23  
24  
25  
26  
27  
28  
29  
30  
31  
32  
33  
34  
35  
36  
37  
38  
39  
40  
41  
42  
43  
44  
45  
46  
47  
48  
49  
50  
51  
52  
53  
54  
55  
56  
57  
58  
59  
60

For peer review only

**REFERENCES:**

1. Rudnicka, E., et al., *The World Health Organization (WHO) approach to healthy ageing*. *Maturitas*, 2020. **139**: p. 6-11.
2. Dzau, V.J., et al., *Achieving healthy human longevity: A global grand challenge*. *Sci Transl Med*, 2020. **12**(566).
3. He, X., et al., *Basic and translational aging research in China: present and future*. *Protein Cell*, 2019. **10**(7): p. 476-484.
4. Chen, R., et al., *China has faster pace than Japan in population aging in next 25 years*. *Biosci Trends*, 2019. **13**(4): p. 287-291.
5. Chen, Z., et al., *Social frailty and longitudinal risk of depressive symptoms in a Chinese population: the Rugao Longevity and Aging Study*. *Psychogeriatrics*, 2021. **21**(4): p. 483-490.
6. Zhang, Y.S., et al., *Links Between Mortality and Socioeconomic Characteristics, Disease Burden, and Biological and Physical Functioning in the Aging Chinese Population*. *J Gerontol B Psychol Sci Soc Sci*, 2021.
7. Freedman, V.A. and J.D. Kasper, *Cohort Profile: The National Health and Aging Trends Study (NHATS)*. *Int J Epidemiol*, 2019. **48**(4): p. 1044-1045g.
8. Vasiliadis, H.M., et al., *Screening instruments for a population of older adults: The 10-item Kessler Psychological Distress Scale (K10) and the 7-item Generalized Anxiety Disorder Scale (GAD-7)*. *Psychiatry Res*, 2015. **228**(1): p. 89-94.
9. Dias, F., et al., *Accuracy of the 15-item Geriatric Depression Scale (GDS-15) in a community-dwelling oldest-old sample: the Pieta Study*. *Trends Psychiatry Psychother*,

2017. **39**(4): p. 276-279.
10. Kvitting, A.S., et al., *Age-Normative MMSE Data for Older Persons Aged 85 to 93 in a Longitudinal Swedish Cohort*. J Am Geriatr Soc, 2019. **67**(3): p. 534-538.
11. Chien, M.Y., T.Y. Huang, and Y.T. Wu, *Prevalence of sarcopenia estimated using a bioelectrical impedance analysis prediction equation in community-dwelling elderly people in Taiwan*. J Am Geriatr Soc, 2008. **56**(9): p. 1710-5.
12. Landi, F., et al., *Age-Related Variations of Muscle Mass, Strength, and Physical Performance in Community-Dwellers: Results From the Milan EXPO Survey*. J Am Med Dir Assoc, 2017. **18**(1): p. 88 e17-88 e24.
13. Cruz-Jentoft, A.J., et al., *Prevalence of and interventions for sarcopenia in ageing adults: a systematic review. Report of the International Sarcopenia Initiative (EWGSOP and IWGS)*. Age Ageing, 2014. **43**(6): p. 748-59.
14. Friedman, B. and Y. Li, *Using Rasch Analysis to Evaluate Accuracy of Individual Activities of Daily Living (ADL) and Instrumental Activities of Daily Living (IADL) for Disability Measurement*. J Appl Meas, 2015. **16**(3): p. 315-35.
15. Zhang, H., et al., *The association between PSQI score and hypertension in a Chinese rural population: the Henan Rural Cohort Study*. Sleep Med, 2019. **58**: p. 27-34.
16. Xiao, J., et al., *Association between social support and health-related quality of life among Chinese seafarers: A cross-sectional study*. PLoS One, 2017. **12**(11): p. e0187275.
17. Montejano Lozoya, R., et al., *Predictive ability of the Mini Nutritional Assessment Short Form (MNA-SF) in a free-living elderly population: a cross-sectional study*. PeerJ, 2017.



1  
2  
3  
4  
5  
6  
7  
8  
9  
10  
11  
12  
13  
14  
15  
16  
17  
18  
19  
20  
21  
22  
23  
24  
25  
26  
27  
28  
29  
30  
31  
32  
33  
34  
35  
36  
37  
38  
39  
40  
41  
42  
43  
44  
45  
46  
47  
48  
49  
50  
51  
52  
53  
54  
55  
56  
57  
58  
59  
60

5: p. e3345.

For peer review only

# BMJ Open

## Cohort Profile: A natural population cohort study on long-lived adults: West China Longevity and Aging Procedure (WCLAP)

|                                 |                                                                                                                                                                                                                                                                                                                                                                                                                                                                                                                                                                                                                                                                                                                                                                                                                                                                                                                                                                                                                                                                                                                                                                                                        |
|---------------------------------|--------------------------------------------------------------------------------------------------------------------------------------------------------------------------------------------------------------------------------------------------------------------------------------------------------------------------------------------------------------------------------------------------------------------------------------------------------------------------------------------------------------------------------------------------------------------------------------------------------------------------------------------------------------------------------------------------------------------------------------------------------------------------------------------------------------------------------------------------------------------------------------------------------------------------------------------------------------------------------------------------------------------------------------------------------------------------------------------------------------------------------------------------------------------------------------------------------|
| Journal:                        | <i>BMJ Open</i>                                                                                                                                                                                                                                                                                                                                                                                                                                                                                                                                                                                                                                                                                                                                                                                                                                                                                                                                                                                                                                                                                                                                                                                        |
| Manuscript ID                   | bmjopen-2021-055407.R1                                                                                                                                                                                                                                                                                                                                                                                                                                                                                                                                                                                                                                                                                                                                                                                                                                                                                                                                                                                                                                                                                                                                                                                 |
| Article Type:                   | Cohort profile                                                                                                                                                                                                                                                                                                                                                                                                                                                                                                                                                                                                                                                                                                                                                                                                                                                                                                                                                                                                                                                                                                                                                                                         |
| Date Submitted by the Author:   | 01-Apr-2022                                                                                                                                                                                                                                                                                                                                                                                                                                                                                                                                                                                                                                                                                                                                                                                                                                                                                                                                                                                                                                                                                                                                                                                            |
| Complete List of Authors:       | WU, Xiaochu; Sichuan University West China Hospital, National Clinical Research Center for Geriatrics( WCHSCU)<br>Zhang, Tianyao; The No.1 Affiliated Hospital of Chengdu Medical College<br>Zhang, Yan; Sichuan University West China Hospital, National Clinical Research Center for Geriatrics( WCHSCU)<br>She, Yan; Mei Shan Shi Peng Shan Qu Chinses Medicine Hospital<br>Wang, Li; People's Hospital of Leshan<br>Gao, Yanling; Sichuan University West China Hospital of Yibin Hospital<br>Deng, Yiping; Sichuan University West China Hospital, National Clinical Research Center for Geriatrics( WCHSCU)<br>Chen, Meijuan; People's Hospital of Leshan<br>He, Yan; Sichuan University West China Hospital of Yibin Hospital<br>Chen, Xiaoyan; Sichuan University West China Hospital, National Clinical Research Center for Geriatrics<br>Hao, Qiukui; Sichuan University West China Hospital, National Clinical Research Center for Geriatrics( WCHSCU)<br>Yue, Jirong; Sichuan University West China Hospital, National Clinical Research Center for Geriatrics( WCHSCU)<br>Dong, Birong; Sichuan University West China Hospital, National Clinical Research Center for Geriatrics( WCHSCU) |
| <b>Primary Subject Heading</b>: | Geriatric medicine                                                                                                                                                                                                                                                                                                                                                                                                                                                                                                                                                                                                                                                                                                                                                                                                                                                                                                                                                                                                                                                                                                                                                                                     |
| Secondary Subject Heading:      | Geriatric medicine                                                                                                                                                                                                                                                                                                                                                                                                                                                                                                                                                                                                                                                                                                                                                                                                                                                                                                                                                                                                                                                                                                                                                                                     |
| Keywords:                       | PUBLIC HEALTH, EPIDEMIOLOGY, GERIATRIC MEDICINE                                                                                                                                                                                                                                                                                                                                                                                                                                                                                                                                                                                                                                                                                                                                                                                                                                                                                                                                                                                                                                                                                                                                                        |
|                                 |                                                                                                                                                                                                                                                                                                                                                                                                                                                                                                                                                                                                                                                                                                                                                                                                                                                                                                                                                                                                                                                                                                                                                                                                        |

SCHOLARONE™  
Manuscripts

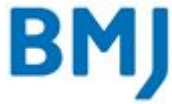

I, the Submitting Author has the right to grant and does grant on behalf of all authors of the Work (as defined in the below author licence), an exclusive licence and/or a non-exclusive licence for contributions from authors who are: i) UK Crown employees; ii) where BMJ has agreed a CC-BY licence shall apply, and/or iii) in accordance with the terms applicable for US Federal Government officers or employees acting as part of their official duties; on a worldwide, perpetual, irrevocable, royalty-free basis to BMJ Publishing Group Ltd ("BMJ") its licensees and where the relevant Journal is co-owned by BMJ to the co-owners of the Journal, to publish the Work in this journal and any other BMJ products and to exploit all rights, as set out in our [licence](#).

The Submitting Author accepts and understands that any supply made under these terms is made by BMJ to the Submitting Author unless you are acting as an employee on behalf of your employer or a postgraduate student of an affiliated institution which is paying any applicable article publishing charge ("APC") for Open Access articles. Where the Submitting Author wishes to make the Work available on an Open Access basis (and intends to pay the relevant APC), the terms of reuse of such Open Access shall be governed by a Creative Commons licence – details of these licences and which [Creative Commons](#) licence will apply to this Work are set out in our licence referred to above.

Other than as permitted in any relevant BMJ Author's Self Archiving Policies, I confirm this Work has not been accepted for publication elsewhere, is not being considered for publication elsewhere and does not duplicate material already published. I confirm all authors consent to publication of this Work and authorise the granting of this licence.

# Cohort Profile: A natural population cohort study on long-lived adults: West China Longevity and Aging Procedure (WCLAP)

## AUTHORS:

1. **Xiaochu Wu\***; National Clinical Research Center for Geriatrics , West China Hospital , Sichuan University , Guoxue Road No.37, Chengdu, China; wuxiaochu123@126.com; +008613321425328.

2. **Tianyao Zhang\***; The First Affiliated Hospital of Chengdu Medical College, Baoguang Avenue No.278, Chengdu, China; tianyaozhang123@163.com; +008615828294370.

3. **Yan Zhang** ; National Clinical Research Center for Geriatrics , West China Hospital , Sichuan University , Guoxue Road No.37, Chengdu, China; 942334572@qq.com; +008613281095992.

4. **Yan She**; Mei Shan Shi Peng Shan Qu Chinses Medicine Hospital, Jianshe Road No.58, Meishan City, China; 381385665@qq.com; +008613547668733.

5. **Li Wang**; Leshan People's Hospital, Baita Road No.238, Leshan, China; thewangli289@163.com; +008613320915736.

6. **Yanling Gao**; The Second People's Hospital of Yibin, West China Hospital of Sichuan University, Yibin Hospital, Beida Road No.96, Yibin, China; 1398079448@qq.com; +008618090968891.

7. **Yiping Deng**; National Clinical Research Center for Geriatrics, West China Hospital, Sichuan University, Guoxue Road No.37, Chengdu, China; niaoxuanhuajing@126.com ; +008617391649348.

8. **Meijuan Chen**; Leshan People's Hospital, Baita Road No.238, Leshan, China;

1  
2  
3  
4 1 12187342@qq.com; +008618283320808.  
5

6 2 **9. Yan He**; The Second People's Hospital of Yibin, West China Hospital of Sichuan  
7  
8 3 University, Yibin Hospital, Beida Road No.96, Yibin, China; 510629664@qq.com;  
9  
10 4 +008613547702862.  
11

12 5 **10. Xiaoyan Chen**; Zigong Fifth People's Hospital, Tongxing Road No.39, Zigong,  
13  
14 6 China; 379531722@qq.com; +008618282388852.  
15

16  
17 7 **11. Qiukui Hao**; National Clinical Research Center for Geriatrics , West China  
18  
19 8 Hospital , Sichuan University , Guoxue Road No.37, Chengdu, China;  
20  
21 9 haoqiukui@foxmail.com; +008618280096281.  
22  
23

24  
25 10 **12. Jirong Yue**; National Clinical Research Center for Geriatrics , West China  
26  
27 11 Hospital , Sichuan University , Guoxue Road No.37, Chengdu, China;  
28  
29 12 yuejirong11@hotmail.com ; +008618980601143.  
30

31 13 **CORRESPONDING AUTHOR:**  
32

33  
34 14 **Birong Dong**; National Clinical Research Center for Geriatrics , West China Hospital  
35  
36 15 , Sichuan University , Guoxue Road No.37, Chengdu, China; birongdong@163.com ;  
37  
38 16 +008618980601332  
39

40  
41 17 \*Xiaochu Wu and Tianyao Zhang contributed equally to this paper.  
42  
43

44 18 **WORD COUNT: 4369 words.**  
45  
46

47 19  
48  
49  
50  
51  
52  
53  
54  
55  
56  
57  
58  
59  
60

## ABSTRACT

**Purpose:** The West China Longevity and Aging Procedure cohort study (WCLAP) aims to provide guidance for older adults in western China with the aim of improving quality of life, reducing the burden of family care, summarizing the characteristics of longevity lifestyles, building a Chinese-longevity-population biobank, and exploring the mechanisms underlying population aging.

**Participants:** Since the establishment of the WCLAP research baseline in 2018, a population of 1,537 adults aged 80 years and above, living in the community, have been enrolled in the program as research participants. Of these, 231 are aged 100 years and above. Participants are followed up every year.

**Finding to data:** WCLAP data is collected in 5 hospital research sub-centers strategically located adjacent to the national "Longevity Townships" of Chengdu Ziyang, Leshan, Yibin, and Pengshan. Data collection included a comprehensive assessment of the participant's health (including physical, psychological, social, common chronic disease assessments), instrumental tests (body composition and muscle percentage), and the collection of biomedical-biobank samples (include blood, urine, feces, hair, and urine).

**Future plans:** Through the annual cohort follow-up, survival-related information is collected at a group level. Analysis of biological samples facilitates biological characterization at the microscopic level through proteomics, metabolomics, genomics, and other techniques. Baseline data, group-level follow-up data, and microbiological examination data are integrated together to provide an evaluation tool, exploring sarcopenia, disability, dementia, caregiver burden, aging biomarkers, and other influencing factors.

**Registration:** The WCLAP was approved by the Medical Ethics Committee of the West China Hospital of Sichuan University (Reference Number: 2018-463), and

1  
2  
3  
4 1 registered with the China Clinical Trial Registration Center (Registration number:  
5 2 ChiCTR1900020754).

6  
7  
8 3 **Keywords:** Natural population; Long-lived adults; Cohort study; Sarcopenia; Frailty;  
9 4 Dementia.

## 10 5 **STRENGTHS AND LIMITATIONS OF THIS STUDY**

### 11 6 **Strengths**

12  
13  
14  
15  
16  
17  
18 7 The first multi-center study conducted in the elderly Chinese people living in Longevity  
19 8 Townships.

20  
21  
22 9 Exploring longevity-related behaviors in western China, and characterizing chronic  
23 10 diseases incident in this population (sarcopenia, disability, mild cognitive impairment;  
24 11 MCI, frailty, etc.) and the present prevalence of these diseases.

25  
26  
27  
28  
29 12 Establishing a biological sample bank of people living in these areas, and plan to find  
30 13 and verify longevity-related biomarkers by multi-omics.

### 31 14 **Limitations**

32  
33  
34  
35  
36 15 Much of the data is collected through self-report, creating a potential for recall bias. To  
37 16 counter this, data evaluators underwent comprehensive training, but there may still be  
38 17 investigator bias in the evaluation stage.

39  
40  
41  
42 18 The target population of this research is elderly adults, so a selective survival bias may  
43 19 exist in the disease epidemiological aspects of the research, as may the loss to follow-  
44 20 up bias.

### 45 21 **Data availability statement**

46  
47  
48  
49 22 Data are available on reasonable request. All data relevant to the study are available on  
50 23 reasonable request to the corresponding author.

51  
52  
53  
54  
55  
56 24

## 1 INTRODUCTION

2 The increasing age of the population has become one of the main factors affecting the  
3 quality of life globally. As the elderly population increases, age-related chronic  
4 conditions contribute to the global healthcare burden and are anticipated to become the  
5 next global public health challenge[1]. There is much research ongoing to determine  
6 how best to achieve healthy aging, improve quality of life in old age, and reduce the  
7 burden on family caregivers of elderly disabled relatives. As such, a great investment  
8 is being driven into the field of aging health in various countries. In 2018, the population  
9 of people aged over 64 surpassed that of children under 5 for the first time. By 2050, it  
10 is predicted that nearly 20% of the world's population will be over 65[2]. Consequently,  
11 the workforce in social production is likely to face increased life pressure and social  
12 responsibility. It is important to establish a balance between social burden and social  
13 productivity, and a good strategy is required to achieve this.

14 In 2000, China was acknowledged to have an aging society. A national survey  
15 conducted by the National Bureau of Statistics reported China's elderly population  
16 (defined as those aged 60 and over) to have reached 249 million at the end of 2018,  
17 comprising 17.9% of the total population; with those aged 65 and over numbering 167  
18 million, accounting for 11.9% of the total population[3]. This rate of aging is projected  
19 to increase further to 24.7% in the next 25 years[4]. In 2010, Chinese scholars reported  
20 the total number of people over 60 to be 178 million, accounting for 13.32% of the total  
21 population and predicted that by 2030, this will reach 359 million. By 2050, the total  
22 number of people over 60 is estimated to reach 448 million, accounting for about 40%  
23 of the total population, with a serious impact on quality of life[5, 6]. In the future, with  
24 further advancements in technology and human intelligence, China is expected to face  
25 more severe consequences from this aging society.

26 The elderly population of longevity townships in China has different behavioral  
27 characteristics to those in Europe and America, including the variety and structure of



1 dietary intake, economic level, educational background, psychological health (anxiety,  
2 depression), the provision of family care, and physical activity. The present research  
3 aims to focus on the behavioral characteristics associated with high-quality survival and  
4 longevity of the elderly population in China's longevity areas. This will be achieved by  
5 assessing the lifestyles at a large scale and the biological multi-omics at the microscopic  
6 scale. This study aims to summarize the characteristics associated with longevity in this  
7 special population of elderly Chinese people. By starting from the concept of primary  
8 prevention, this study aims to characterize behaviors associated with a long and healthy  
9 and longevity life, providing government departments with evidence supporting public  
10 health primary prevention strategies. Conversely, through the testing and analysis of  
11 biological samples with the help of metabolomics, proteomics, and other methods,  
12 biomarkers of healthy aging will be identified to provide a basis for the future  
13 development of anti-aging drugs and the treatment of age-related diseases.

14

## 15 **COHORT DESCRIPTION**

### 16 **Study design and setting**

17 The design and baseline of WCLAP were formed in 2017 and 2018, respectively, with  
18 the plan of conducting an annual cohort follow-up. WCLAP was designed to be a  
19 prospective dynamic cohort study across 4 medical and health institutions in the  
20 National Longevity Region in western China. From October 10, 2018, to December 1,  
21 2019, WCLAP successively established baseline research subcenters in five longevity  
22 regions in western China; Chengdu (The West China Hospital of Sichuan University),  
23 Ziyang (Ziyang Zhonghua Hospital), Leshan (The First People's Hospital of Leshan  
24 City), Meishan (Pengshan Traditional Chinese Medicine Hospital of Meishan City),  
25 and Yibin (The Second People's Hospital of Yibin City). The data collected by each  
26 sub-center were collated at the West China Hospital of Sichuan University (WCHSCU).  
27 All biological samples were collected according to standardized operational processes

1 and stored in the biological specimen bank of the West China Hospital of Sichuan  
2 University.

3

#### 4 **Ethnical approval**

5 The WCLAP was approved by the Medical Ethics Committee of the West China  
6 Hospital of Sichuan University (Reference Number: 2018-463), and registered with the  
7 China Clinical Trial Registration Center (Registration number: ChiCTR1900020754).

8

#### 9 **Data collection**

10 Data collection comprised (1) the completion of a questionnaire survey, (2) a full  
11 physical examination, and (3) biological specimen collection and laboratory tests.

12 The design of the questionnaire was based on the National Health and Aging Trends  
13 Study (NHATS) created by the Johns Hopkins University[7] and applied to the  
14 population of western China. The contents of the questionnaire survey comprised basic  
15 demographic characteristics, social activity, family longevity, health and disease status,  
16 lifestyle behaviors, and evaluation scales. Before the formal use of the questionnaire,  
17 our team carried out pre-test among the old adult in the community to continuously  
18 verify the reliability and validity of the questionnaire. The internal consistency was  
19 determined from Cronbach's alpha calculation. Our questionnaire had a Cronbach's  
20 alpha of 0.91, and finally was confirmed the final version.

21 The physical examination included measures of grip strength, pace, body mass index  
22 (BMI), blood pressure, skinfold thickness at the triceps, the sit-up test, and body  
23 composition. Before data collection, all test instruments were calibrated according to  
24 manufacturer guidelines.

25 Biological specimen collection for laboratory testing included blood, urine, stool, saliva,

1 and hair. Subjects were provided with a free routine screening of their blood and urine  
2 samples within one month of their physical examination.

3

#### 4 **Study subjects**

5 Participants were recruited from the National Longevity Region in Western China. The  
6 eligibility criteria were as follows:

7 1. Participants agreed to participate in the study and signed an informed consent form.

8 2. Participants were aged 80 years old or older (according to their identification card).

9 3. Participants had lived in the locality for at least 1 year.

10 4. Participants were willing and able to cooperate with the evaluator in the local  
11 language to complete the 30-minute evaluation.

12 Exclusion criteria:

13 1. Unwillingness to sign the informed consent form, complete all assessment content  
14 independently.

15 2. The presence of metal implants in the body, such as stents, artificial joints, pins,  
16 plates, or cardiac pacemakers.

17 3. Being under the age of 80 (according to their identification card).

18 4. Having a life expectancy of under 6 months (diagnosed by medical institution).

19

#### 20 **Sampling method**

21 A multi-stage cluster sampling method was used as follows:

22 1. The study population comprised the population of elderly adults across the varied  
23 topography and landforms of the national longevity area in western China, including

1 hills, basins, mountains, and plains.

2 2. Given the two factors of the geographical environment and the extent of the national  
3 longevity areas, four cities in western China were selected as sub-centers for the study,  
4 namely Meishan, Ziyang, Yibin, and Leshan.

5 3. Given the influence of many factors, including the convenience of transport routes,  
6 the willingness of municipal/county/village-level government bodies to cooperate, the  
7 sizes of local populations, the distances between collection points and local sub-centers,  
8 and local acceptance of modern medicine, districts were selected adjacent to each sub-  
9 center. These were Pengshan District (adjacent to Meishan City), Yanjiang District  
10 (adjacent to Ziyang City), Cuiping District (adjacent to Yibin City), and Shizhong  
11 District (adjacent to Leshan City).

12 4. In each of the above districts, a number of towns (10 towns from Pengshan, 17 towns  
13 from Yanjiang, 12 towns from Cuiping, 12 towns from Shizhong) were randomly  
14 selected based on factors such as accessibility, population size and structure.

15 5. Data collection was conducted at each research site, facilitated by preliminary  
16 communication with government departments, sub-centers, and community  
17 organizations at all levels of the project site, to initiate social mobilization and publicity  
18 for the study. Residents of each of the selected towns were invited to voluntarily  
19 participate in the study. Our team will provide each participant with free medical  
20 examination service (about 90 USD) and long-term health follow-up service (free  
21 hospital referral service will be provided if necessary) as compensation.

## 22 **Baseline evaluation**

23 The baseline assessment was completed in 2019, whereby 1,546 elderly adults  
24 participated. The baseline assessment included the survey, biological sample collection,  
25 and physical examination as detailed above.

26 The questionnaire included basic personal information, information about social and

1 support networks, social microenvironment, religious beliefs, family longevity, chronic  
 2 disease, health self-assessment, eating habits, household drinking water, smoking status,  
 3 alcohol/tea intake, physical exercise, and daily and leisure activity. This was achieved  
 4 using validated assessment tools, and where possible those designed specifically for use  
 5 in elderly populations; Activities of Daily Living (ADL)[8-10], Instrumental Activities  
 6 of Daily Living (IADL)[9, 10], Clinical Frailty Scale[11, 12], Social Support Rating  
 7 Scale (SSRS)[13], Pittsburgh Sleep Quality Index (PSQI)[14, 15], the short form of the  
 8 multi-nutritional assessment (MNA-SF)[16, 17], mini mental-state exam (MMSE)[18,  
 9 19], the Generalized Anxiety Disorder questionnaire (GAD-7)[20] and the Geriatric  
 10 Depression Scale (GDS-15)[21]. The questionnaire contents are detailed in Table 1.

11 **Table 1: The main contents of the questionnaire survey**

| Questionnaire Frame        | Content Description                                                                                                                                                                                                                                           |
|----------------------------|---------------------------------------------------------------------------------------------------------------------------------------------------------------------------------------------------------------------------------------------------------------|
| Basic personal information | Name, gender, age, ID number, place of birth, length of local residence, local residential address, telephone number (her/himself + relatives), Educational background, nationality, language (minority language), main occupation before 60 years old, etc.. |
| Social network & support   | Childbirth (number of sons and daughters), family situation, family financial control, family respect, home care, family function, neighbor/friend relationship, support and assistance, marriage/spouse situation, etc.                                      |
| SRSS Scale                 | Social support evaluation, including friends, neighbors, family, asking for help, talking, etc.                                                                                                                                                               |

|                            |                                                                                                                                                                                                                  |
|----------------------------|------------------------------------------------------------------------------------------------------------------------------------------------------------------------------------------------------------------|
| Social microenvironment    | Family living area, source of income, annual family income, and economic satisfaction.                                                                                                                           |
| Religious belief           | Religious type, religious activities                                                                                                                                                                             |
| Longevity Family Survey    | Long-lived relatives, family history of genetic disease                                                                                                                                                          |
| History of chronic disease | Types of chronic diseases, hospitalization, medical insurance, medical expenses in the past year, satisfaction with medical conditions, timely medical treatment, etc.                                           |
| Health self-assessment     | Limitation of activity, physical state, emotional state, pain, self-feeling, etc.                                                                                                                                |
| Eating habits              | The number of meals per day, the amount of food, the combination of meals, whether or not breakfast, salt intake, cooking methods, eating speed, taste preference and dietary intake structure/ frequency/ type. |
| MNA-SF Scale               | BMI, psychology, calf circumference, mid-arm circumference diet, etc.                                                                                                                                            |
| Household drinking water   | Type/source of drinking water.                                                                                                                                                                                   |
| Smoking                    | Smoking history, age of first smoking, cigarette type, smoking cessation history, smoking status of family members, second-hand smoke inhalation status.                                                         |
| Alcohol intake             | Drinking history, first drinking age, drinking frequency and type.                                                                                                                                               |

|                          |                                                                                                                          |
|--------------------------|--------------------------------------------------------------------------------------------------------------------------|
| Tea intake               | Whether to drink tea now and in the past, age of first drinking, tea type, daily intake (ml).                            |
| Physical exercise        | Whether physical exercise is performed now or in the past, age at physical exercise start and end.                       |
| Daily & Leisure activity | Housework, farming, raising poultry, reading, playing mahjong, TV, radio, chat in teahouses, etc.                        |
| ADL Scale                | Daily living ability assessment, including eating, walking, dressing, bathing, etc.                                      |
| IADL Scale               | Instrumental assessment of activities of daily living, including cooking, taking medicine, shopping, calling, etc.       |
| Frail Scale              | Fatigue, endurance, walking, illness, weight loss.                                                                       |
| PSQI Scale               | Sleep assessment                                                                                                         |
| MMSE Scale               | Cognitive function assessment, including orientation, memory, attention, calculation, meeting ability, language ability. |
| GAD-7 Scale              | Anxiety assessment, including nervousness, worry, irritability, fear, etc.                                               |
| GDS-15 Scale             | Depression assessment, including feelings of helplessness, memory, getting help, difficulty, boredom, emptiness, etc.    |

- 1 *Note:* SSRS, Social Support Rating Scale; MNA-SF, Mini Nutritional Assessment-Short Form; ADL, Activities of  
 2 Daily Living; IADL, Instrumental Activities of Daily Living; PSQI, Pittsburgh Sleep Quality Index; MMSE, Mini-  
 3 mental State Examination; GAD-7, Generalized Anxiety Disorder-7; GDS-15, Geriatric Depression Scale-15.

1

2 Biological samples were collected from participants, and in return they received a free  
 3 routine blood and urine screening including liver and kidney function tests. All  
 4 specimens were pre-processed on the day of collection. For convenience, samples were  
 5 labelled with the participant's basic information, including their sample number, name,  
 6 gender, and age. All specimens except hair specimens were stored temporarily at 4°C  
 7 before being moved (using dry ice to ensure ultra-low temperature refrigeration  
 8 throughout the transportation) to the main -80°C storage facility at the Biological  
 9 Specimen Bank of West China Hospital of Sichuan University. The description of the  
 10 specimen pre-processing procedure and long-term storage conditions at each sub-center are  
 11 shown in Table 2.

12

**Table 2: Specimen pre-processing procedure and long-term storage conditions**

| Sample Type | Pre-Process Standard Method                                                                                                                                                             | Storage Condition                         |
|-------------|-----------------------------------------------------------------------------------------------------------------------------------------------------------------------------------------|-------------------------------------------|
| Blood       | 2 tubes (5ml/tube) of blood per person were collected, which had been centrifuged by 3500 rpm in 15 minutes, and divided into 8 EP tubes (2 tubes of albuginea and 6 tubes of plasma ). | -80°C ultra-low temperature refrigerator. |
| Urine       | On the day of collection, the urine was divided into 2 EP tubes (2 ml and 15 ml each) at room temperature.                                                                              | -80°C ultra-low temperature refrigerator. |
| Stool       | Take a small amount, place in                                                                                                                                                           | -80°C ultra-low temperature               |



|        |                                                                                                      |                                           |
|--------|------------------------------------------------------------------------------------------------------|-------------------------------------------|
|        | the preservation solution, and mix well.                                                             | refrigerator.                             |
| Saliva | Centrifuge, 2500 rpm, 1 minute, the supernatant and residue were placed in two 5ml pointed EP tubes. | -80°C ultra-low temperature refrigerator. |
| Hair   | Put 10-20 hairs (10 cm/piece) in a sealed bag.                                                       | Store at room temperature.                |

1 *Note:* All EP tubes are suitable for ultra-low temperature storage.

2

3 A full physical examination was conducted to characterize the basic physical fitness  
4 level and incidence of age-related disease (such as sarcopenia) in the study population.

5 The procedure for the full physical examination is shown in Table 3.

6

**Table 3: Physical examination procedure**

|                    | Item                    | Description                                                                                                                              |
|--------------------|-------------------------|------------------------------------------------------------------------------------------------------------------------------------------|
| Physical condition | Height                  | Stand up straight, measure 2 times in a row, and ask about last year's weight                                                            |
|                    | Weight                  | Take off the coat and other heavy clothes, repeat the measurement twice.                                                                 |
|                    | Upper arm circumference | Measure the circumference of the upper arm at the midpoint of the line between the shoulder and the elbow, repeat the measurement twice. |
|                    | Triceps skinfold        | Use a cortical thickness gauge to measure                                                                                                |

|                           |                                           |                                                                                                                                                                                     |
|---------------------------|-------------------------------------------|-------------------------------------------------------------------------------------------------------------------------------------------------------------------------------------|
|                           | thickness                                 | the fat thickness at the midpoint of the shoulder and elbow joint, repeat the measurement twice.                                                                                    |
|                           | Calf circumference                        | Keep leg upright, measure the circumference of the thickest part of the calf, repeat the measurement twice.                                                                         |
|                           | Waist circumference                       | Measure the waist circumference at a point 2 cm above the belly button, repeat the measurement twice.                                                                               |
|                           | Hip circumference                         | The circumference between the symphysis pubis and the most convex part of the back gluteus maximus, repeat the measurement twice.                                                   |
|                           | Knee height                               | The length between the knee joint and the heel, repeat the measurement twice.                                                                                                       |
|                           | Finger distance                           | The length between the index fingers of both hands, repeat the measurement twice.                                                                                                   |
| Disease related condition | Blood pressure& Pulse                     | After sitting and resting for 2-5 minutes, start the measurement, record the diastolic and systolic blood pressure (electronic sphygmomanometer), and repeat the measurement twice. |
|                           | Electrocardiogram bioelectrical impedance | After confirming that there is no metal in the participant's body, use INBODY S10 (BioSpace, Seoul, Korea) to measure the                                                           |

|  |                      |                                                                                                                                                                                     |
|--|----------------------|-------------------------------------------------------------------------------------------------------------------------------------------------------------------------------------|
|  | analysis (BIA)       | BIA data, enter the participant's information into the host, adopt a sitting posture, and connect all limbs with electrodes. No talking is allowed during the measurement.          |
|  | Gait speed (s/m)     | Measure the pace of the participants and calculate the pace (seconds/meter) at the start and end times of 3 segments of 4 meters.                                                   |
|  | Grip strength        | Ask the participant's habit of using hands and test the grip strength of both hands twice.                                                                                          |
|  | Balance test         | Participants were tested for balance in three stances, including feet side by side, staggered feet, and front and rear feet. Each stance held for 10 seconds was deemed qualified.  |
|  | Blood sugar          | Fingertip blood sugar test.                                                                                                                                                         |
|  | Sit-up ability tests | Participants hold their shoulders, complete 1 and 5 consecutive sit-up tests respectively, and record the completion status (whether it can be completed and when it is completed). |

1

2 **Measurement of key variables**3 **Mental state and cognitive assessment**

1  
2  
3  
4 1 The assessment of the psychological state mainly comprised the evaluation of anxiety  
5  
6 2 and depression in participants using the GAD-7 and GDS-15 assessment tools,  
7  
8 3 respectively. The GAD-7 comprises 7 questions to assess the participant's generalized  
9  
10 4 anxiety in the past 2 weeks. The GAD-7 scale is scored from 0 to 21, with a higher  
11  
12 5 score representing a more severe anxiety level. The evaluation standards are 0-4 points  
13  
14 6 signifying a normal level, 5-9 points for mild anxiety, 10-14 points for moderate anxiety,  
15  
16 7 and 15-21 points signifying severe anxiety[22]. The GDS-15 scale is used in the  
17  
18 8 evaluation of depression in elderly adults over the past week. The scale consists of 4  
19  
20 9 questions that are scored directly and 11 reverse-scored questions. Again, a higher score  
21  
22 10 represents the more severe depression. The evaluation standards are 0-4 signifying a  
23  
24 11 normal level, 5-8 for mild depression, 9-11 for moderate depression, and 12-15  
25  
26 12 signifying severe depression[23].

27  
28 13 Considering the characteristics of China's elderly population, such as low education  
29  
30 14 level, poor economic level, and the need for an assessment that was easy to administer,  
31  
32 15 this study used the MMSE to evaluate cognitive function. The MMSE scale evaluates  
33  
34 16 participants' orientation, memory, recall ability, language ability, attention, and  
35  
36 17 calculation ability through 30 questions. The highest achievable score is 30, with scores  
37  
38 18 of 0-26 points representing cognitive dysfunction[24].

### 39 40 19 **Sarcopenia**

41  
42  
43 20 Following the recommendations of the "Asian Working Group for Sarcopenia: 2019  
44  
45 21 Consensus Update on Sarcopenia Diagnosis and Treatment", the assessment of  
46  
47 22 sarcopenia in used this study mainly comprised the measurement of grip strength, pace,  
48  
49 23 and Bioelectrical Impedance Analysis (BIA; Inbody S10, BioSpace, Seoul, Korea).  
50  
51 24 Previous studies have shown no statistical differences between the use of magnetic  
52  
53 25 resonance imaging (MRI) and BIA for the assessment of sarcopenia[25]. Muscle mass  
54  
55 26 was defined using the appendicular skeletal muscle mass index (ASMI), calculated  
56  
57 27 similarly to BMI, using the formula, appendicular skeletal mass (ASM) / height<sup>2</sup>. A

1  
2  
3  
4 1 threshold of 7.0 kg/m<sup>2</sup> in men and 5.7 kg/m<sup>2</sup> in women was considered to signify low  
5  
6 2 muscle mass. Low grip strength for men and women was defined as 26 kg and 18 kg,  
7  
8 3 respectively[26]. The participant's usual walking speed was measured over 4 m, with a  
9  
10 4 gait speed of less than 0.8 m/s considered to signify sarcopenia[27].

## 11 5 **Activities of daily life**

12  
13  
14  
15 6 Participants' daily living activity assessment used health self-assessment measures  
16  
17 7 (body, emotion, feeling) together with the ADL (level of basic self-care) and IADL  
18  
19 8 (ability to use basic appliances) scales[8-10]. Based on previous research findings, we  
20  
21 9 additionally used some simple, independently-designed health self-evaluation  
22  
23 10 questions covering the previous month of the participant's life condition, including  
24  
25 11 overall self-evaluation, limitations of the ability to undertake activity, the impact of  
26  
27 12 health status on daily life, the impact of emotional status on daily life, pain status, self-  
28  
29 13 assessed psychological state, the influence of health and mental state on daily social  
30  
31 14 interaction, and other issues.

32  
33 15 The ADL scale assesses participants' ability to take care of themselves by asking the  
34  
35 16 ability of participants to defecate, urinate, groom, use the toilet, eat, move, dress, use  
36  
37 17 the stairs, and bathe. The full scale of the scale comprises 100 points, with 100 points  
38  
39 18 representing perfect ability with no need to rely on others; 61-99 points representing a  
40  
41 19 mild dysfunction, but basically having the ability to take care of themselves; 41-60  
42  
43 20 points representing moderate dysfunction, and needing some help; 21-40 points  
44  
45 21 representing severe dysfunction and needing to be dependent on others; and less than  
46  
47 22 20 points representing complete dependence on others.

48  
49 23 The IADL scale comprehensively evaluates the participants' ability to use basic  
50  
51 24 appliances. The evaluation content includes cooking, housework, taking medicine,  
52  
53 25 walking, shopping, financial management, using the telephone, and washing clothes.  
54  
55 26 The scale has a maximum score of 16, with a score of less than 8 indicating impaired  
56  
57 27 instrumental life ability[9].  
58  
59  
60

## 1 **Sleep quality**

2 The PSQI scale is used to evaluate the sleep of participants through sleep quality, the  
3 time taken to fall asleep, duration of sleep, sleep efficiency, sleep disorders, use of  
4 hypnotic drugs, and daytime dysfunction. The scale has a maximum score of 21 points,  
5 with a score of 0-5 representing the best sleep quality; 6-10 good sleep quality; 11-15  
6 average sleep quality; and 16-21 poor sleep quality. In addition, we also asked questions  
7 about “siesta”/napping and the Sleep Self-Assessment[28].

## 8 **Medical history and social support**

9 Participants were asked to provide a full medical history of chronic diseases (diagnosed  
10 by professional medical institutions), including cardiovascular and cerebrovascular  
11 diseases, respiratory diseases, nervous system diseases, hearing disorders, bone and  
12 joint diseases, liver and kidney diseases, and incontinence. The assessor asked about  
13 the symptoms experienced, including whether the participant was ill, the number of  
14 years they experienced the illness, and the treatment undertaken.

15 The SSRS was used to evaluate the social support of the participants through factors  
16 such as the social interaction between the participants and friends, neighbors, family  
17 members, and social groups[29]. The maximum score of this scale is 40 points, with a  
18 higher score representing better social support. A score of 30-40 was considered to  
19 represent a good degree of social support; a score of 20-29 a general degree of social  
20 support; and a score of less than 20 a lower degree of social support. In addition, we  
21 investigated the family microenvironment, including the housing structure, family  
22 economic control/discourse power, family respect, family decision-making, family  
23 support, family conflict response, and spousal relationship.

## 24 **Nutrition and behavior**

25 The MNA-SF was used to conduct a nutritional assessment[30]. This assessment tool  
26 consists of two sections, with all participants completing the first section and

1 participants only progressing to the second section if they scored less than 11 points on  
2 the first, indicating possible malnutrition. A combined score (scores from both sections  
3 added together) of greater than 24 points was interpreted as a good nutritional status;  
4 17-23.5 points was interpreted as a risk of malnutrition; and a score of less than 17  
5 indicated the definite presence of malnutrition.

6 In addition, based on the characteristics of the traditional Chinese diet and previous  
7 research findings, we independently designed a series of survey questions related to  
8 eating habits, diet types, and the frequency with which they ate certain foods. The  
9 survey of eating habits included the number of meals per day, meal times, the amount  
10 eaten at each meal, the types of food eaten at each meal (meat and vegetables), breakfast,  
11 flavorings, cooking methods, and speed of eating. Dietary content was assessed by  
12 asking how frequently (i.e. daily, 3-5 times a week, 1-2 times a week, 1-3 times a  
13 month, or never) participants consumed grains, vegetables, fruits, meat, eggs, seafood,  
14 dairy products, vegetable oil, animal oil, nuts, candy, cakes, etc.

15 Participant behavior was captured by asking about smoking, alcohol intake, tea intake,  
16 physical labor, and leisure activities. Participants were asked whether they smoke (at  
17 least one cigarette per day for more than 6 months), for how many years, what type of  
18 cigarettes, how many cigarettes per day, whether they had attempted to quit smoking,  
19 whether they experienced second-hand smoke inhalation, and how often. Similarly,  
20 alcohol consumption was defined as drinking alcohol at least once a week. Participants  
21 were asked at what age they started drinking alcohol, their drinking frequency, type of  
22 alcohol consumed, and the volume of a single drink. Participants were asked if they  
23 drank tea frequently (more than 3 times a week), whether their habits had been different  
24 in the past, the age they started drinking tea, the type of tea, and the amount of tea  
25 consumed daily.

26 Manual labor was assessed by asking participants whether they undertake moderate or  
27 severe manual labor, the number of days they did this per week, and the number of

1 hours per day. Leisure activities were captured including growing vegetables, raising  
2 poultry, raising pets, reading books and newspapers, educational activities (Mahjong,  
3 etc.), watching television or listening to the radio, socializing in tea houses, etc.

#### 4 **Follow-up**

5 The follow-up tool was designed taking into account the characteristics/results of the  
6 baseline data (October 2018-December 2019), key issues (frailty, cognition, disability,  
7 sarcopenia, psychology, etc.), and follow-up methods (phone or face-to-face follow-  
8 up). In 2020, the follow-up work needed to incorporate further external factors such as  
9 COVID-19, and the government's policy response. The initial plan was to conduct a  
10 telephone follow-up with all participants recruited at baseline. Later, depending on the  
11 COVID-19 situation in China, it may be possible to conduct an in-person follow-up.

12 The telephone follow-up comprised a phone call of no longer than 10 minutes. For any  
13 participants who had died, the investigator recorded the date of death, cause of death,  
14 and other information, and comforted the family members of the deceased. For  
15 participants with the wrong phone number, the investigator tried to contact their family  
16 members or community staff to minimize the rate of loss to follow-up. For participants  
17 who were temporarily unavailable/busy, the investigator re-attempted contact on at  
18 least 5 occasions at different times of the working day/week/weekend. Telephone  
19 follow-up investigators were mostly medical college students, and all received  
20 comprehensive training.

21 Following completion of the telephone follow-up on all participants recruited at  
22 baseline, the attrition rate of the study was assessed. Then, according to the sample size  
23 requirements of the prospective dynamic cohort study, new participants were recruited  
24 to join the cohort, in line with the recruitment criteria outlined above.

#### 25 **Data quality control and management**

26 Due to the participants being over 80 years old, and the locations of longevity areas



1  
2  
3  
4 1 being typically in marginal mountainous areas, this study chose to conduct data capture  
5  
6 2 using paper questionnaires. Paper questionnaires were verified on the day of data  
7  
8 3 collection. 30-50% of the questionnaires were randomly selected for verification by two  
9  
10 4 independent investigators on the same day. Any missing or ambiguous responses were  
11  
12 5 confirmed by the investigator telephoning the participant.

13  
14 6 The database was established using Epidata3.0. Independent double entry was used,  
15  
16 7 and the two independent databases were compared using the "consistency check"  
17  
18 8 function of the software. Any inconsistencies between the two databases were modified  
19  
20 9 on a case-by-case basis until the two databases were completely consistent.

21  
22 10 All biological specimens were pre-processed and marked on the day of collection  
23  
24 11 (adding marking information, such as name, gender, age, and code, etc., based on the  
25  
26 12 original barcode and QR code of each cryopreservation tube), and stored in the ultra-  
27  
28 13 low temperature refrigerator Medium (-80 degrees Celsius). The transport conditions  
29  
30 14 of biological specimens in intra-city were with the help of a transfer box, which was  
31  
32 15 kept at 4 degrees Celsius to avoid hemolysis of biological specimens; for the transfer  
33  
34 16 of biological specimens between cities, dry ice was used to maintain an ultra-low  
35  
36 17 temperature environment, and the entire process of transport had a temperature control  
37  
38 18 record; all biological specimens According to ethical requirements, were stored in the  
39  
40 19 biological specimen bank of West China Hospital of Sichuan University for long-term  
41  
42 20 preservation. At the same time, after each transfer was completed, whether it was intra-  
43  
44 21 city transfer or inter-city transfer, random inspections (1-3%) of the location  
45  
46 22 information of cryopreservation tubes were required to ensure that the storage location  
47  
48 23 of biological specimens will not change due to the transfer work. (Change, move and  
49  
50 24 loss of storage location information, etc.).

51  
52 25 All evaluation results would be fed back to the person or family members within one  
53  
54 26 month, laying a good foundation of trust for the next follow-up work.

55  
56 27 The Principal Investigator (PI) has overall responsibility for data management,  
57  
58 28 including data storage, application, and use. The data management plan follows

1 guidance on medical ethics, fairness, and bias. Therefore, before using the data, the data  
2 was de-identified by removing sensitive information such as the fields of participant  
3 name, gender, age, identification number, and home address.

#### 4 **PATIENT AND PUBLIC INVOLVEMENT**

5 No patient involved.

#### 7 **STATISTICAL STRATEGY AND FINDINGS TO DATE**

8 Data analyses were conducted using SPSS version 22.0 and R 3.6.1. Descriptive  
9 statistical analyses were conducted on longevity-related characteristics and medical  
10 examination data to provide percentages, means, and standard deviations. For  
11 interrogation of independent samples by region, gender, ages, and disease, chi-squared  
12 tests were used. If the conditions for using chi-squared tests were not met, the Fisher  
13 test was used instead. For variables such as scores on any of the psychometric or  
14 behavioral scales, the rank-sum test was used.

15 Participant characteristics are displayed in Table 4.

16 **Table 4: Participant characteristics**

| Characteristics              | All<br>(n=1537) | Men<br>(n=643) | Women<br>(n=894) | P value | Missing<br>number |
|------------------------------|-----------------|----------------|------------------|---------|-------------------|
| <b>Age(years), mean(±SD)</b> | 88.7 (7.36)     | 87.7 (6.39)    | 89.40<br>(7.91)  | <0.001  | 1                 |
| <b>80-85</b>                 | 682 (44.4)      | 295 (46.0)     | 387 (43.3)       | <0.001  | 1                 |
| <b>86-90</b>                 | 293 (19.1)      | 142 (22.1)     | 151 (16.9)       |         |                   |

|                                   |             |            |            |        |    |
|-----------------------------------|-------------|------------|------------|--------|----|
| <b>91-99</b>                      | 328 (21.4)  | 150 (23.4) | 178 (19.9) |        |    |
| <b>≥100</b>                       | 233 (15.2)  | 55 (8.6)   | 178 (19.9) |        |    |
| <b>Ethnics, n (%)</b>             |             |            |            |        | 3  |
| <b>Han</b>                        | 1530 (99.7) | 639 (99.7) | 891 (99.8) |        |    |
| <b>Others</b>                     | 4 (0.3)     | 2 (0.4)    | 2 (0.2)    |        |    |
| <b>Educational level, n (%)</b>   |             |            |            | <0.001 | 6  |
| <b>No formal education</b>        | 915 (59.8)  | 232 (36.3) | 683 (76.6) |        |    |
| <b>Elementary school</b>          | 432 (28.2)  | 281(44.0)  | 151 (16.9) |        |    |
| <b>Middle school</b>              | 98 (6.4)    | 66 (10.3)  | 32 (3.6)   |        |    |
| <b>Technical secondary school</b> | 35(2.3)     | 23(3.6)    | 12(1.3)    |        |    |
| <b>High school and above</b>      | 51 (3.3)    | 37(5.8)    | 14 (1.6)   |        |    |
| <b>Status of spouse, n (%)</b>    |             |            |            | <0.001 | 20 |
| <b>Alive</b>                      | 512 (33.8)  | 352(55.3)  | 160 (18.2) |        |    |
| <b>Divorced</b>                   | 5 (0.3)     | 2 (0.3)    | 3 (0.3)    |        |    |
| <b>Widowed</b>                    | 1000 (65.9) | 282 (44.3) | 718 (81.5) |        |    |

|                                |              |              |              |        |          |
|--------------------------------|--------------|--------------|--------------|--------|----------|
| <b>Annual household income</b> |              |              |              |        | <b>8</b> |
| <b>per capita, n (%)</b>       |              |              |              |        |          |
| <b>&lt; 1000 rmb/year</b>      | 77(5.0)      | 32(5.0)      | 45(5.1)      |        |          |
| <b>1000-3000 rmb/year</b>      | 299(19.6)    | 121(18.9)    | 178(20.0)    |        |          |
| <b>3001-6000 rmb/year</b>      | 257(16.8)    | 101(15.8)    | 156(17.5)    |        |          |
| <b>6001-8000 rmb/year</b>      | 104(6.8)     | 41(6.4)      | 63(7.1)      |        |          |
| <b>8001-10000 rmb/year</b>     | 75(4.9)      | 29(4.5)      | 46(5.2)      |        |          |
| <b>&gt; 10000 rmb/year</b>     | 582 ( 38.1 ) | 269 ( 42.1 ) | 313 ( 35.2 ) |        |          |
| <b>Unknown</b>                 | 135 ( 8.8 )  | 46 ( 7.2 )   | 89 ( 10.0 )  |        |          |
| <b>Anthropometric measures</b> |              |              |              |        |          |
| <b>Height (cm)</b>             | 148.4 (10.7) | 156.1 (7.7)  | 142.8 (8.9)  | <0.001 | 12       |
| <b>Weight(kg)</b>              | 49.4 (10.4)  | 54.3 (9.8)   | 45.9 (9.4)   | <0.001 | 12       |
| <b>BMI (kg/m<sup>2</sup>)</b>  | 22.3 (3.7)   | 22.2 (3.3)   | 22.4 (4.0)   | <0.001 | 15       |
| <b>Underweight (&lt;18.5)</b>  | 201 (13.2)   | 62 (9.7)     | 139 (15.7)   |        |          |
| <b>Normal (18.5–24.0)</b>      | 863 (56.7)   | 391 (61.2)   | 472 (53.4)   |        |          |
| <b>Overweight (24.0-27.9)</b>  | 356 (23.4)   | 158 (24.7)   | 198 (22.4)   |        |          |
| <b>Obese (&gt; 28.0)</b>       | 103 (6.8)    | 28 (4.4)     | 75 (8.5)     |        |          |

|                                     |     |             |             |             |        |     |
|-------------------------------------|-----|-------------|-------------|-------------|--------|-----|
| <b>Grip strength</b>                |     | 17.5 (11.2) | 22.2 (11.0) | 14.0 (10.0) | <0.001 | 47  |
| <b>4-meter gait speed</b>           |     | 0.58 (0.23) | 0.63 (0.22) | 0.58 (0.23) | <0.001 | 103 |
| <b>Life-styles</b>                  |     |             |             |             |        |     |
| <b>Drinking</b>                     | Yes | 435 (28.4)  | 329 (51.4)  | 106 (11.9)  | <0.001 | 6   |
| <b>tea history</b>                  | No  | 1096 (71.6) | 311 (48.6)  | 785 (88.1)  |        |     |
| <b>Drinking</b>                     | Yes | 476 (31.1)  | 196 (46.2)  | 180 (20.2)  | <0.001 | 6   |
| <b>alcohol history</b>              | No  | 1055 (68.9) | 344 (53.8)  | 711 (79.8)  |        |     |
| <b>Smoking history</b>              | Yes | 429 (28.1)  | 332 (52.1)  | 97 (10.9)   | <0.001 | 9   |
|                                     | No  | 1099 (71.9) | 305 (47.9)  | 794 (89.1)  |        |     |
| <b>Scale evaluation</b>             |     |             |             |             |        |     |
| <b>ADL scale result</b>             |     | 93.3 (14.3) | 95.3 (12.0) | 91.9 (15.6) | <0.001 | 17  |
| <b>Good (100 points)</b>            |     | 934 (61.7)  | 443 (70.0)  | 491(55.7)   |        |     |
| <b>Mild dysfunction (&gt;60)</b>    |     | 514 (33.9)  | 170 (26.9)  | 344 (39.0)  |        |     |
| <b>Moderate dysfunction (41-60)</b> |     | 36 (2.4)    | 12 (1.9)    | 24 (2.7)    |        |     |
| <b>Severe dysfunction (21-40)</b>   |     | 17 (1.1)    | 4 (0.6)     | 13 (1.5)    |        |     |

|                                     |             |            |            |        |     |
|-------------------------------------|-------------|------------|------------|--------|-----|
| <b>Completely disabled (&lt;20)</b> | 14 (0.9)    | 4 (0.6)    | 10 (1.1)   |        |     |
| <b>IADL scale result</b>            | 11.4 (4.6)  | 12.1 (4.2) | 10.9 (4.9) | <0.001 | 16  |
| <b>Good function (≥8)</b>           | 1214 (79.8) | 542 (85.6) | 672 (75.7) |        |     |
| <b>Impaired function (&lt; 20)</b>  | 307 (20.2)  | 91 (14.4)  | 216 (24.3) |        |     |
| <b>MMSE scale result</b>            | 16.3 (8.1)  | 19.0 (7.7) | 14.3 (7.7) | <0.001 | 174 |
| <b>normal</b>                       | 151 (11.1)  | 100 (17.3) | 51 (6.5)   |        |     |
| <b>Cognitive Impairment</b>         | 1212 (88.9) | 478 (82.7) | 734 (93.5) |        |     |

1

## 2 COLLABORATION

3 Welcome geriatric medicine and longevity related researchers through our center  
 4 website (<http://www.wchscu.cn/scientific/clinical/platform/55440.html>) for more data  
 5 information (Database name: A natural cohort study of the old adult), if researchers  
 6 have any requirements, you can also contact us by E-Mail ([hxncrcg@163.com](mailto:hxncrcg@163.com)) for  
 7 more details and cooperation.

## 8 FUTURE DETAILS

9 It is planned to continue to carry out annual participant follow-up and collection of  
 10 biological samples. Participants in the existing cohort will be followed up continuously,  
 11 and new participants will be recruited into the prospective dynamic cohort study based  
 12 on maintaining a constant sample size (i.e. to compensate for dropout). Participants  
 13 who did not have the opportunity to contribute biological samples at the baseline time  
 14 point will be followed up as soon as possible, and annual sample collections will occur  
 15 as appropriate.

1  
2  
3  
4 1 Global aging problem has been coming. How to improve the longevity and quality of  
5  
6 2 life is a great challenge for modern medicine, biology and sociology. Centenarians are  
7  
8 3 an important model to study longevity and "healthy aging". The project will conduct  
9  
10 4 experiments on gene and protein levels of centenarians from blood samples to explore  
11  
12 5 the mechanism of longevity and aging, and provide a theoretical basis for the prevention  
13  
14 6 and treatment of aging-related diseases, which would be reasonable for extension of  
15  
16 7 life and realization of healthy aging.

17  
18 8 Frailty syndrome is a systemic change, which companions with multi-system  
19  
20 9 dysfunction, especially the decline of capacity of physiological reserve in  
21  
22 10 neuromuscular, metabolic and immune systems in the elderly. Frailty could reduce the  
23  
24 11 ability to fight stress and significantly increasing the risk of adverse events in the elderly.  
25  
26 12 In order to evaluate the diagnostic accuracy of frailness, the selection, detection,  
27  
28 13 validation and clinical application of biomarkers representing different stages of  
29  
30 14 frailness based on biological theory were established from the perspective of genomics  
31  
32 15 and epigenetics.

33  
34 16 We are going to further explore the biological mechanisms of elderly health aging,  
35  
36 17 reveal changes in the longevous elderly, discover some novel important longevity-  
37  
38 18 related genes and their related functions and signal path, from genomics, apparent  
39  
40 19 genome, transcriptome, proteomics, metabolomics, microbial genomics level.  
41  
42 20 Furthermore, confirmatory researches need to be extensive based on biomarkers  
43  
44 21 associated with longevity among population. In combination with animal models, anti-  
45  
46 22 aging drugs, cells and other therapeutic strategies would be discovered.

47  
48 23 The findings of these complex analyses will be exploited for any factors that can be  
49  
50 24 translated into community benefit. With reference to China's aging society, non-  
51  
52 25 pharmaceutical health intervention and promotion programs will be explored and  
53  
54 26 formulated with the intention of meeting the needs of the current and future Chinese  
55  
56 27 population. We will propose primary prevention measures suitable for community

1 health promotion, which will be beneficial for a healthy lifestyle, incorporating what  
2 we have learned about the behaviors of the elderly Chinese inhabitants of Longevity  
3 Townships.

#### 4 **ACKNOWLEDGEMENTS**

5 We would like to thank Pengshan District Hospital of Traditional Chinese Medicine,  
6 Yibin Second People's Hospital, Leshan People's Hospital and Ziyang Zhonghua  
7 Hospital for their strong support and assistance in this study. At the same time, thanks  
8 for the help from Ru Gao, Hanlin Liu, Lingling Shen, Yi Lv, Aiguo Yang, Shuli Jia,  
9 Meiling Ge.

#### 10 **CONTRIBUTIONS**

11 Writing: Xiaochu Wu, Tianyao Zhang; Study design: Qiukui Hao, Jirong Yue, Birong  
12 Dong; Project coordination: Xiaochu Wu, Yipeng Deng, Tianyao Zhang, Birong Dong;  
13 Data acquisition: Xiaochu Wu, Yan Zhang, Yan She, Li Wang, Yanling Gao, Meijuan  
14 Chen, Yan He; Data quality control: Xiaochu Wu, Xiaoyan Chen, Birong Dong; Data  
15 management: Xiaochu Wu, Birong Dong.

#### 16 **FUNDING**

- 17 1. 1.3.5 project for disciplines of excellence, West China Hospital, Sichuan University  
18 (ZY2017201).
- 19 2. Project of Max Cynader Academy of Brain Workstation, West China Hospital,  
20 Sichuan University (HXYS19005).
- 21 3. National Key R&D Program of China ( 2018YFC2000305 ) .

#### 22 **Disclaimer**

23 Our sources of funding had no role in the design of cohort profile, and will not be any  
24 impact on data collection, analysis, writing and decision to submit or publish the  
25 research results.



## 1 COMPETING INTERESTS

2 None.

## 3 PATIENT AND PUBLIC INVOLVEMENT STATEMENT

4 It was not appropriate or possible to involve patients or the public in the design, or  
5 conduct, or reporting, or dissemination plans of our research.

## 6 REFERENCES:

- 7 1. Rudnicka, E., et al., *The World Health Organization (WHO) approach to healthy ageing*.  
8 *Maturitas*, 2020. **139**: p. 6-11.
- 9 2. Dzau, V.J., et al., *Achieving healthy human longevity: A global grand challenge*. *Sci Transl*  
10 *Med*, 2020. **12**(566).
- 11 3. He, X., et al., *Basic and translational aging research in China: present and future*. *Protein Cell*,  
12 2019. **10**(7): p. 476-484.
- 13 4. Chen, R., et al., *China has faster pace than Japan in population aging in next 25 years*. *Biosci*  
14 *Trends*, 2019. **13**(4): p. 287-291.
- 15 5. Chen, Z., et al., *Social frailty and longitudinal risk of depressive symptoms in a Chinese*  
16 *population: the Rugao Longevity and Aging Study*. *Psychogeriatrics*, 2021. **21**(4): p. 483-490.
- 17 6. Zhang, Y.S., et al., *Links Between Mortality and Socioeconomic Characteristics, Disease*  
18 *Burden, and Biological and Physical Functioning in the Aging Chinese Population*. *J Gerontol*  
19 *B Psychol Sci Soc Sci*, 2021.
- 20 7. Freedman, V.A. and J.D. Kasper, *Cohort Profile: The National Health and Aging Trends Study*  
21 *(NHATS)*. *Int J Epidemiol*, 2019. **48**(4): p. 1044-1045g.
- 22 8. Friedman, B. and Y. Li, *Using Rasch Analysis to Evaluate Accuracy of Individual Activities of*  
23 *Daily Living (ADL) and Instrumental Activities of Daily Living (IADL) for Disability*  
24 *Measurement*. *J Appl Meas*, 2015. **16**(3): p. 315-35.
- 25 9. Pashmdarfard, M. and A. Azad, *Assessment tools to evaluate Activities of Daily Living (ADL)*  
26 *and Instrumental Activities of Daily Living (IADL) in older adults: A systematic review*. *Med J*  
27 *Islam Repub Iran*, 2020. **34**: p. 33.
- 28 10. Henskens, M., et al., *The effects of movement stimulation on activities of daily living*  
29 *performance and quality of life in nursing home residents with dementia: a randomized*  
30 *controlled trial*. *Clin Interv Aging*, 2018. **13**: p. 805-817.
- 31 11. Xu, L., et al., *Clinical Frailty Scale and Biomarkers for Assessing Frailty in Elder Inpatients in*  
32 *China*. *J Nutr Health Aging*, 2021. **25**(1): p. 77-83.
- 33 12. Afilalo, J., *The Clinical Frailty Scale: Upgrade Your Eyeball Test*. *Circulation*, 2017. **135**(21):  
34 p. 2025-2027.
- 35 13. Lu, S., et al., *Association of Formal and Informal Social Support With Health-Related Quality*  
36 *of Life Among Chinese Rural Elders*. *Int J Environ Res Public Health*, 2020. **17**(4).
- 37 14. Han, Q., et al., *Pittsburgh Sleep Quality Index score predicts all-cause mortality in Chinese*

- 1  
2  
3  
4  
5  
6  
7  
8  
9  
10  
11  
12  
13  
14  
15  
16  
17  
18  
19  
20  
21  
22  
23  
24  
25  
26  
27  
28  
29  
30  
31  
32  
33  
34  
35  
36  
37  
38  
39  
40  
41  
42  
43  
44  
45  
46  
47  
48  
49  
50  
51  
52  
53  
54  
55  
56  
57  
58  
59  
60
- 1            *dialysis patients*. *Int Urol Nephrol*, 2021. **53**(11): p. 2369-2376.
- 2    15.    Purani, H., S. Friedrichsen, and A.M. Allen, *Sleep quality in cigarette smokers: Associations*  
3            *with smoking-related outcomes and exercise*. *Addict Behav*, 2019. **90**: p. 71-76.
- 4    16.    Kaiser, M.J., et al., *Validation of the Mini Nutritional Assessment short-form (MNA-SF): a*  
5            *practical tool for identification of nutritional status*. *J Nutr Health Aging*, 2009. **13**(9): p. 782-  
6            8.
- 7    17.    Dent, E., et al., *Malnutrition Screening and Assessment in Hospitalised Older People: a Review*.  
8            *J Nutr Health Aging*, 2019. **23**(5): p. 431-441.
- 9    18.    Trivedi, D., *Cochrane Review Summary: Mini-Mental State Examination (MMSE) for the*  
10           *detection of dementia in clinically unevaluated people aged 65 and over in community and*  
11           *primary care populations*. *Prim Health Care Res Dev*, 2017. **18**(6): p. 527-528.
- 12   19.    Pinto, T.C.C., et al., *Is the Montreal Cognitive Assessment (MoCA) screening superior to the*  
13           *Mini-Mental State Examination (MMSE) in the detection of mild cognitive impairment (MCI)*  
14           *and Alzheimer's Disease (AD) in the elderly?* *Int Psychogeriatr*, 2019. **31**(4): p. 491-504.
- 15   20.    Creese, B., et al., *Loneliness, physical activity, and mental health during COVID-19: a*  
16           *longitudinal analysis of depression and anxiety in adults over the age of 50 between 2015 and*  
17           *2020*. *Int Psychogeriatr*, 2021. **33**(5): p. 505-514.
- 18   21.    Shin, C., et al., *Usefulness of the 15-item geriatric depression scale (GDS-15) for classifying*  
19           *minor and major depressive disorders among community-dwelling elders*. *J Affect Disord*, 2019.  
20           **259**: p. 370-375.
- 21   22.    Vasiliadis, H.M., et al., *Screening instruments for a population of older adults: The 10-item*  
22           *Kessler Psychological Distress Scale (K10) and the 7-item Generalized Anxiety Disorder Scale*  
23           *(GAD-7)*. *Psychiatry Res*, 2015. **228**(1): p. 89-94.
- 24   23.    Dias, F., et al., *Accuracy of the 15-item Geriatric Depression Scale (GDS-15) in a community-*  
25           *dwelling oldest-old sample: the Pieta Study*. *Trends Psychiatry Psychother*, 2017. **39**(4): p. 276-  
26           279.
- 27   24.    Kvitting, A.S., et al., *Age-Normative MMSE Data for Older Persons Aged 85 to 93 in a*  
28           *Longitudinal Swedish Cohort*. *J Am Geriatr Soc*, 2019. **67**(3): p. 534-538.
- 29   25.    Chien, M.Y., T.Y. Huang, and Y.T. Wu, *Prevalence of sarcopenia estimated using a*  
30           *bioelectrical impedance analysis prediction equation in community-dwelling elderly people in*  
31           *Taiwan*. *J Am Geriatr Soc*, 2008. **56**(9): p. 1710-5.
- 32   26.    Landi, F., et al., *Age-Related Variations of Muscle Mass, Strength, and Physical Performance*  
33           *in Community-Dwellers: Results From the Milan EXPO Survey*. *J Am Med Dir Assoc*, 2017.  
34           **18**(1): p. 88 e17-88 e24.
- 35   27.    Cruz-Jentoft, A.J., et al., *Prevalence of and interventions for sarcopenia in ageing adults: a*  
36           *systematic review. Report of the International Sarcopenia Initiative (EWGSOP and IWGS)*. *Age*  
37           *Ageing*, 2014. **43**(6): p. 748-59.
- 38   28.    Zhang, H., et al., *The association between PSQI score and hypertension in a Chinese rural*  
39           *population: the Henan Rural Cohort Study*. *Sleep Med*, 2019. **58**: p. 27-34.
- 40   29.    Xiao, J., et al., *Association between social support and health-related quality of life among*  
41           *Chinese seafarers: A cross-sectional study*. *PLoS One*, 2017. **12**(11): p. e0187275.
- 42   30.    Montejano Lozoya, R., et al., *Predictive ability of the Mini Nutritional Assessment Short Form*  
43           *(MNA-SF) in a free-living elderly population: a cross-sectional study*. *PeerJ*, 2017. **5**: p. e3345.

1  
2  
3  
4  
5  
6  
7  
8  
9  
10  
11  
12  
13  
14  
15  
16  
17  
18  
19  
20  
21  
22  
23  
24  
25  
26  
27  
28  
29  
30  
31  
32  
33  
34  
35  
36  
37  
38  
39  
40  
41  
42  
43  
44  
45  
46  
47  
48  
49  
50  
51  
52  
53  
54  
55  
56  
57  
58  
59  
60

1

For peer review only
